# Supplementary material
Source: PubMed Central journal article supplement (PMC6052296)
Supplement: JVI.00356-18_zjv015183745s1.pdf [file JVI.00356-18_zjv015183745s1.pdf]

## Dataset S1: BPV1 E2 CompPASS Analysis

| TSC | SYMBOL     | FOUND<br>IN | TSCs    | WD-<br>SCORE | NWD-<br>SCORE | Z-<br>SCORE | WF   | RATIO |
|-----|------------|-------------|---------|--------------|---------------|-------------|------|-------|
| 176 | BPV1_E2    | 2           | 127,224 | 363.28       | 5.98          | 8.49        | 1.04 | 3/79  |
| 28  | BRD4       | 2           | 25,30   | 275.9        | 4.54          | 8.77        | 1.32 | 2/79  |
| 9   | NHLRC2     | 2           | 9,8     | 237          | 3.9           | 8.8         | 1    | 1/79  |
| 9   | SMC6       | 2           | 8,10    | 237          | 3.9           | 8.8         | 1    | 1/79  |
| 3   | BRD2       | 2           | 3,2     | 136.83       | 2.25          | 8.71        | 1    | 1/79  |
| 3   | ATAD5      | 2           | 2,3     | 136.83       | 2.25          | 8.71        | 1    | 1/79  |
| 3   | ZNF696     | 2           | 1,4     | 136.83       | 2.25          | 8.71        | 1    | 1/79  |
| 60  | USP5       | 2           | 43,77   | 131.6        | 2.17          | 5.25        | 1.29 | 6/79  |
| 2   | GOPC       | 2           | 3,1     | 111.72       | 1.84          | 8.57        | 1    | 1/79  |
| 2   | SMC5       | 2           | 3,1     | 111.72       | 1.84          | 8.57        | 1    | 1/79  |
| 12  | SUPT5H     | 2           | 16,8    | 84.29        | 1.39          | 8.68        | 1.54 | 5/79  |
| 1   | BAT1       | 2           | 1,1     | 79           | 1.3           | 9           | 1    | 1/79  |
| 1   | EXOSC3     | 2           | 1,1     | 79           | 1.3           | 9           | 1    | 1/79  |
| 1   | PDIA4      | 2           | 1,1     | 79           | 1.3           | 9           | 1    | 1/79  |
| 1   | HIST1H2AA  | 2           | 1,1     | 79           | 1.3           | 9           | 1    | 1/79  |
| 1   | PLUNC      | 2           | 1,1     | 79           | 1.3           | 9           | 1    | 1/79  |
| 1   | CKM        | 2           | 1,1     | 79           | 1.3           | 9           | 1    | 1/79  |
| 1   | NHP2       | 2           | 1,1     | 79           | 1.3           | 9           | 1    | 1/79  |
| 6   | TRMT61B    | 2           | 5,6     | 64.5         | 1.06          | 7.93        | 1    | 3/79  |
| 8   | USP47      | 2           | 8,8     | 55.86        | 0.92          | 7.98        | 1    | 4/79  |
| 2   | RRBP1      | 2           | 2,1     | 55.86        | 0.92          | 7.84        | 1    | 2/79  |
| 2   | ILK-2;CCT4 | 2           | 2,2     | 55.86        | 0.92          | 3.84        | 1    | 2/79  |
| 2   | NDUFS1     | 2           | 1,2     | 55.86        | 0.92          | 3.84        | 1    | 2/79  |
| 1   | JMJD6      | 2           | 1,1     | 39.5         | 0.65          | 6.06        | 1    | 2/79  |
| 1   | TPR        | 2           | 1,1     | 39.5         | 0.65          | 6.06        | 1    | 2/79  |
| 1   | KRT27      | 2           | 1,1     | 39.5         | 0.65          | 6.06        | 1    | 2/79  |
| 1   | PSMB3      | 2           | 1,1     | 39.5         | 0.65          | 6.06        | 1    | 2/79  |
| 1   | ABCF2      | 2           | 1,1     | 39.5         | 0.65          | 6.06        | 1    | 2/79  |
| 1   | CKAP5      | 2           | 1,1     | 39.5         | 0.65          | 6.06        | 1    | 2/79  |
| 3   | UCHL3      | 2           | 2,3     | 37.63        | 0.62          | 0.39        | 1.1  | 4/79  |
| 2   | DLAT       | 2           | 1,3     | 37.24        | 0.61          | 7.22        | 1    | 3/79  |
| 5   | RNH1       | 2           | 3,6     | 35.33        | 0.58          | 6.72        | 1    | 5/79  |
| 1   | MYH9       | 2           | 1,1     | 31.44        | 0.52          | 0.05        | 1.99 | 5/79  |
| 2   | COPS3      | 2           | 2,1     | 31.28        | 0.51          | -0.03       | 1.12 | 4/79  |
| 5   | GSTP1      | 2           | 5,4     | 29.45        | 0.48          | 7.98        | 1    | 6/79  |
| 2   | EEF1D      | 2           | 2,1     | 27.93        | 0.46          | 5.49        | 1    | 4/79  |
| 1   | KPNA2      | 2           | 1,1     | 26.33        | 0.43          | 3.52        | 1    | 3/79  |
| 1   | SMU1       | 2           | 1,1     | 26.33        | 0.43          | 3.52        | 1    | 3/79  |
| 1   | CSTA       | 2           | 1,1     | 26.33        | 0.43          | 3.52        | 1    | 3/79  |
| 1   | RALY       | 2           | 1,1     | 26.33        | 0.43          | 3.52        | 1    | 3/79  |

### Dataset S3: BPV1 E8/E2C CompPASS Analysis

| TSC | SYMBOL     | FOUND IN | TSCs  | WD-<br>SCORE | NWD-<br>SCORE | Z-<br>SCORE | WF   | RATIO |
|-----|------------|----------|-------|--------------|---------------|-------------|------|-------|
| 65  | BPV1_E2    | 2        | 58,71 | 212.28       | 3.56          | 7.14        | 1    | 3/79  |
| 51  | FLNB       | 2        | 45,56 | 174.89       | 2.93          | 7.93        | 1.24 | 4/79  |
| 4   | CADPS2     | 2        | 2,6   | 158          | 2.65          | 8.78        | 1    | 1/79  |
| 2   | TRIM58     | 2        | 1,3   | 111.72       | 1.87          | 8.57        | 1    | 1/79  |
| 16  | USP5       | 2        | 11,21 | 82.71        | 1.39          | 1.62        | 1.57 | 6/79  |
| 1   | CADPS      | 2        | 1,1   | 79           | 1.32          | 9           | 1    | 1/79  |
| 1   | CKM        | 2        | 1,1   | 79           | 1.32          | 9           | 1    | 1/79  |
| 42  | FLNA       | 2        | 40,44 | 70.53        | 1.18          | 3.76        | 1.79 | 13/79 |
| 8   | FLNC       | 2        | 7,9   | 66.59        | 1.12          | 0.03        | 2.98 | 10/79 |
| 2   | SQSTM1     | 2        | 2,1   | 55.86        | 0.94          | 7.84        | 1    | 2/79  |
| 2   | TPR        | 2        | 1,2   | 55.86        | 0.94          | 7.84        | 1    | 2/79  |
| 2   | ILK-2;CCT4 | 2        | 1,2   | 55.86        | 0.94          | 3.84        | 1    | 2/79  |
| 3   | KPNA2      | 2        | 2,3   | 45.6         | 0.76          | 6.95        | 1    | 3/79  |
| 1   | ATXN2      | 2        | 1,1   | 39.5         | 0.66          | 6.06        | 1    | 2/79  |
| 1   | DLST;DLSTP | 2        | 1,1   | 39.5         | 0.66          | 3.84        | 1    | 2/79  |
| 1   | EMD        | 2        | 1,1   | 39.5         | 0.66          | 6.06        | 1    | 2/79  |
| 1   | HK3        | 2        | 1,1   | 39.5         | 0.66          | 6.06        | 1    | 2/79  |
| 1   | AHCYL1     | 2        | 1,1   | 37.92        | 0.64          | 0.43        | 1.44 | 3/79  |
| 2   | GYS1       | 2        | 1,2   | 37.24        | 0.62          | 5.88        | 1    | 3/79  |
| 2   | IARS       | 2        | 3,1   | 27.93        | 0.47          | 6.69        | 1    | 4/79  |
| 1   | DLAT       | 2        | 1,1   | 26.33        | 0.44          | 5.05        | 1    | 3/79  |
| 3   | GSTP1      | 2        | 5,1   | 22.81        | 0.38          | 7.07        | 1    | 6/79  |
| 2   | IKBKAP     | 2        | 2,2   | 22.34        | 0.37          | 3.94        | 1    | 5/79  |
| 1   | COPS2      | 2        | 1,1   | 22.32        | 0.37          | -0.1        | 1.13 | 4/79  |
| 2   | RNH1       | 2        | 1,2   | 22.34        | 0.37          | 3.6         | 1    | 5/79  |
| 3   | EFTUD2     | 2        | 2,4   | 20.46        | 0.34          | 0.3         | 2.54 | 17/79 |
| 1   | PYGL       | 2        | 1,1   | 19.75        | 0.33          | 4.32        | 1    | 4/79  |
| 1   | ALDOA      | 2        | 1,1   | 19.75        | 0.33          | 4.32        | 1    | 4/79  |
| 3   | PSMD12     | 2        | 1,4   | 19.34        | 0.32          | -0.12       | 1.98 | 14/79 |
| 3   | PSMC5      | 2        | 2,4   | 16           | 0.27          | -0.02       | 2.22 | 19/79 |
| 3   | PSMC2      | 2        | 1,4   | 16.17        | 0.27          | 0.07        | 1.89 | 16/79 |
| 1   | DICER1     | 2        | 1,1   | 15.8         | 0.26          | 3.76        | 1    | 5/79  |
| 5   | EIF4A1     | 2        | 4,6   | 14.71        | 0.25          | 0.58        | 2.58 | 31/79 |
| 2   | PSMD2      | 2        | 2,2   | 14.88        | 0.25          | -0.1        | 2.13 | 16/79 |
| 3   | PSMC3      | 2        | 2,4   | 14.57        | 0.24          | 0           | 2.13 | 20/79 |
| 2   | PPM1G      | 2        | 1,2   | 12.42        | 0.21          | 1.82        | 1    | 9/79  |
| 2   | SF3B2      | 2        | 1,2   | 12.42        | 0.21          | 5.05        | 1    | 9/79  |
| 2   | DBN1       | 1        | 2     | 12.57        | 0.21          | 8.57        | 1    | 1/79  |
| 2   | CBX3       | 1        | 2     | 12.57        | 0.21          | 8.57        | 1    | 1/79  |
| 7   | KRT16      | 2        | 8,5   | 11.9         | 0.2           | 0.53        | 1.99 | 35/79 |

|    |           |   |       |       |      |       |      |       |
|----|-----------|---|-------|-------|------|-------|------|-------|
| 5  | XRCC6     | 2 | 5,5   | 11.05 | 0.19 | 3.76  | 1    | 16/79 |
| 1  | C8orf33   | 2 | 1,1   | 11.29 | 0.19 | 2.02  | 1    | 7/79  |
| 1  | TP53      | 2 | 1,1   | 11.29 | 0.19 | 1.89  | 1    | 7/79  |
| 5  | DSP       | 2 | 6,4   | 10.83 | 0.18 | 0.29  | 1.9  | 31/79 |
| 4  | SPTBN1    | 2 | 2,5   | 10.54 | 0.18 | 5.31  | 1    | 15/79 |
| 1  | DIS3      | 2 | 1,1   | 9.88  | 0.17 | 3     | 1    | 8/79  |
| 4  | SRRM2     | 2 | 3,4   | 9.3   | 0.16 | 3.03  | 1    | 17/79 |
| 3  | RCN2      | 2 | 2,3   | 9.77  | 0.16 | 2.75  | 1    | 14/79 |
| 2  | KRT6B     | 2 | 2,1   | 9.18  | 0.15 | 0.41  | 1.56 | 19/79 |
| 1  | PFKM      | 1 | 1     | 8.89  | 0.15 | 9     | 1    | 1/79  |
| 1  | MAP1B     | 1 | 1     | 8.89  | 0.15 | 9     | 1    | 1/79  |
| 1  | TSPYL1    | 1 | 1     | 8.89  | 0.15 | 9     | 1    | 1/79  |
| 1  | GBAS      | 1 | 1     | 8.89  | 0.15 | 9     | 1    | 1/79  |
| 1  | HSPE1     | 1 | 1     | 8.89  | 0.15 | 9     | 1    | 1/79  |
| 2  | NDUFS1    | 1 | 2     | 8.89  | 0.15 | 3.84  | 1    | 2/79  |
| 1  | CTCF      | 1 | 1     | 8.89  | 0.15 | 9     | 1    | 1/79  |
| 1  | TBL1XR1   | 1 | 1     | 8.89  | 0.15 | 9     | 1    | 1/79  |
| 1  | RAD18     | 1 | 1     | 8.89  | 0.15 | 9     | 1    | 1/79  |
| 1  | EDC4      | 1 | 1     | 8.89  | 0.15 | 9     | 1    | 1/79  |
| 1  | SPOP      | 1 | 1     | 8.89  | 0.15 | 9     | 1    | 1/79  |
| 1  | PFDN5     | 1 | 1     | 8.89  | 0.15 | 9     | 1    | 1/79  |
| 1  | DSG2      | 1 | 1     | 8.89  | 0.15 | 9     | 1    | 1/79  |
| 1  | NUFIP2    | 1 | 1     | 8.89  | 0.15 | 9     | 1    | 1/79  |
| 1  | IGHA1     | 1 | 1     | 8.89  | 0.15 | 9     | 1    | 1/79  |
| 1  | SMN2;SMN1 | 1 | 1     | 8.89  | 0.15 | 9     | 1    | 1/79  |
| 1  | LDLR      | 1 | 1     | 8.89  | 0.15 | 9     | 1    | 1/79  |
| 1  | BAT1      | 1 | 1     | 8.89  | 0.15 | 9     | 1    | 1/79  |
| 1  | THBS1     | 1 | 1     | 8.89  | 0.15 | 9     | 1    | 1/79  |
| 3  | CCT7      | 2 | 4,2   | 8.45  | 0.14 | 0.15  | 1.73 | 28/79 |
| 2  | GARS      | 2 | 1,3   | 8.6   | 0.14 | 3.42  | 1    | 13/79 |
| 10 | KRT14     | 2 | 11,9  | 7.94  | 0.13 | 1.42  | 1.46 | 46/79 |
| 6  | AHCY      | 2 | 5,7   | 7.98  | 0.13 | 1.14  | 1.94 | 47/79 |
| 1  | DARS      | 2 | 1,1   | 7.9   | 0.13 | 2.26  | 1    | 10/79 |
| 1  | TRIM21    | 2 | 1,1   | 7.9   | 0.13 | 1.45  | 1    | 10/79 |
| 49 | KRT1      | 2 | 49,49 | 7     | 0.12 | 0.67  | 1    | 79/79 |
| 35 | KRT9      | 2 | 28,42 | 6.9   | 0.12 | 1.37  | 1.08 | 73/79 |
| 5  | PRKDC     | 2 | 3,6   | 7.07  | 0.12 | 1.03  | 1    | 25/79 |
| 1  | PSMC6     | 2 | 1,1   | 7.44  | 0.12 | -0.11 | 2.26 | 24/79 |
| 1  | NOP58     | 2 | 1,1   | 7.18  | 0.12 | 2.13  | 1    | 11/79 |
| 1  | C7orf36   | 2 | 1,1   | 7.18  | 0.12 | 1.31  | 1    | 11/79 |
| 1  | POP1      | 2 | 1,1   | 7.18  | 0.12 | 1.83  | 1    | 11/79 |
| 3  | COPS4     | 1 | 3     | 7.32  | 0.12 | -0.07 | 1.81 | 8/79  |
| 2  | GIGYF2    | 1 | 2     | 7.26  | 0.12 | 3.45  | 1    | 3/79  |

|    |           |   |       |      |      |       |      |       |
|----|-----------|---|-------|------|------|-------|------|-------|
| 2  | MTAP      | 1 | 2     | 7.26 | 0.12 | 7.22  | 1    | 3/79  |
| 2  | CSTA      | 1 | 2     | 7.26 | 0.12 | 5.88  | 1    | 3/79  |
| 2  | RPS18     | 1 | 2     | 7.26 | 0.12 | 1.34  | 1    | 3/79  |
| 2  | RALY      | 1 | 2     | 7.26 | 0.12 | 5.88  | 1    | 3/79  |
| 1  | TP53BP1   | 1 | 1     | 7.22 | 0.12 | 0.19  | 1.32 | 2/79  |
| 29 | CAD       | 2 | 27,31 | 6.62 | 0.11 | 1.56  | 1    | 64/79 |
| 4  | TCP1      | 2 | 5,2   | 6.31 | 0.11 | 0.23  | 1.36 | 34/79 |
| 2  | EEF1D     | 1 | 2     | 6.28 | 0.11 | 5.49  | 1    | 4/79  |
| 1  | GPN3      | 1 | 1     | 6.28 | 0.11 | 6.06  | 1    | 2/79  |
| 1  | WDR82     | 1 | 1     | 6.28 | 0.11 | 6.06  | 1    | 2/79  |
| 1  | SAFB2     | 1 | 1     | 6.28 | 0.11 | 6.06  | 1    | 2/79  |
| 1  | PRPF6     | 1 | 1     | 6.47 | 0.11 | 0.13  | 1.59 | 3/79  |
| 1  | NAMPT     | 1 | 1     | 6.28 | 0.11 | 6.06  | 1    | 2/79  |
| 1  | LOC652614 | 1 | 1     | 6.28 | 0.11 | 6.06  | 1    | 2/79  |
| 1  | TPM3      | 1 | 1     | 6.28 | 0.11 | 3.84  | 1    | 2/79  |
| 1  | MGEA5     | 1 | 1     | 6.28 | 0.11 | 2.71  | 1    | 2/79  |
| 1  | CORO1C    | 1 | 1     | 6.28 | 0.11 | 6.06  | 1    | 2/79  |
| 1  | TBC1D4    | 1 | 1     | 6.28 | 0.11 | 6.06  | 1    | 2/79  |
| 1  | OGDH      | 1 | 1     | 6.47 | 0.11 | 1.14  | 1.06 | 2/79  |
| 1  | ACP1      | 1 | 1     | 6.28 | 0.11 | 6.06  | 1    | 2/79  |
| 1  | USP1      | 1 | 1     | 6.28 | 0.11 | 6.06  | 1    | 2/79  |
| 1  | ARIH1     | 1 | 1     | 6.28 | 0.11 | 3.84  | 1    | 2/79  |
| 1  | PSMB3     | 1 | 1     | 6.28 | 0.11 | 6.06  | 1    | 2/79  |
| 1  | DCTN2     | 1 | 1     | 6.28 | 0.11 | 6.06  | 1    | 2/79  |
| 1  | AQR       | 1 | 1     | 6.28 | 0.11 | 6.06  | 1    | 2/79  |
| 1  | FLII      | 1 | 1     | 6.28 | 0.11 | 6.06  | 1    | 2/79  |
| 1  | TRAPPC2L  | 1 | 1     | 6.28 | 0.11 | 6.06  | 1    | 2/79  |
| 5  | AGL       | 2 | 5,4   | 6.17 | 0.1  | 0.79  | 1.5  | 43/79 |
| 1  | CAPRIN1   | 2 | 1,1   | 5.87 | 0.1  | -0.11 | 3.12 | 42/79 |
| 1  | IMPDH2    | 2 | 1,1   | 6.08 | 0.1  | 1.01  | 1    | 13/79 |
| 2  | YWHAZ     | 2 | 1,2   | 6.17 | 0.1  | 0.62  | 1.16 | 21/79 |
| 1  | PRPH      | 2 | 1,1   | 6.08 | 0.1  | 1.5   | 1    | 13/79 |
| 6  | JUP       | 1 | 6     | 5.86 | 0.1  | 2.53  | 1.16 | 16/79 |
| 26 | HSPA8     | 2 | 28,24 | 5.1  | 0.09 | -1.08 | 1    | 79/79 |
| 11 | VIM       | 2 | 12,10 | 5.47 | 0.09 | 2.47  | 1    | 48/79 |
| 5  | SPTAN1    | 2 | 6,3   | 5.34 | 0.09 | 5.59  | 1    | 33/79 |
| 3  | HADHA     | 1 | 3     | 5.38 | 0.09 | 2.76  | 1.1  | 9/79  |
| 2  | CCT6A     | 2 | 2,1   | 5.17 | 0.09 | -0.06 | 1.48 | 32/79 |
| 2  | PSMD1     | 1 | 2     | 5.2  | 0.09 | -0.1  | 2.22 | 13/79 |
| 2  | CCT3      | 2 | 1,2   | 5.58 | 0.09 | 0.09  | 1.5  | 30/79 |
| 1  | PDIA3     | 1 | 1     | 5.13 | 0.09 | 5.05  | 1    | 3/79  |
| 1  | PSMB5     | 1 | 1     | 5.13 | 0.09 | 3.52  | 1    | 3/79  |
| 2  | FXR1      | 2 | 1,2   | 5.08 | 0.09 | 1.49  | 1    | 22/79 |

|    |          |   |       |      |      |       |      |       |
|----|----------|---|-------|------|------|-------|------|-------|
| 1  | MACF1    | 1 | 1     | 5.13 | 0.09 | 5.05  | 1    | 3/79  |
| 2  | XRCC5    | 2 | 1,2   | 5.08 | 0.09 | 1.45  | 1    | 22/79 |
| 3  | PSMD4    | 1 | 3     | 5.32 | 0.09 | 0.45  | 1.55 | 13/79 |
| 2  | EIF3L    | 1 | 2     | 5.39 | 0.09 | -0.07 | 2.21 | 12/79 |
| 1  | GANAB    | 1 | 1     | 5.13 | 0.09 | 5.05  | 1    | 3/79  |
| 1  | SMU1     | 1 | 1     | 5.13 | 0.09 | 3.52  | 1    | 3/79  |
| 1  | PKP1     | 1 | 1     | 5.13 | 0.09 | 5.05  | 1    | 3/79  |
| 1  | TRMT61B  | 1 | 1     | 5.13 | 0.09 | 2.85  | 1    | 3/79  |
| 1  | CSTF1    | 1 | 1     | 5.13 | 0.09 | 2.54  | 1    | 3/79  |
| 1  | MYH9     | 1 | 1     | 5.61 | 0.09 | 0.05  | 1.99 | 5/79  |
| 1  | PYCRL    | 1 | 1     | 5.13 | 0.09 | 3.52  | 1    | 3/79  |
| 1  | PJA2     | 1 | 1     | 5.13 | 0.09 | 5.05  | 1    | 3/79  |
| 6  | CLTC     | 2 | 7,4   | 4.61 | 0.08 | 0.3   | 1.57 | 66/79 |
| 2  | CCT2     | 2 | 2,1   | 5    | 0.08 | -0.14 | 1.88 | 42/79 |
| 1  | HUWE1    | 2 | 1,1   | 4.74 | 0.08 | -0.08 | 1.14 | 19/79 |
| 2  | PCBP2    | 2 | 1,2   | 4.65 | 0.08 | 2.3   | 1    | 24/79 |
| 1  | COPS3    | 1 | 1     | 4.72 | 0.08 | -0.1  | 1.13 | 4/79  |
| 1  | GMPS     | 1 | 1     | 4.79 | 0.08 | 0.25  | 1.74 | 6/79  |
| 1  | EPRS     | 2 | 1,1   | 4.94 | 0.08 | 1.28  | 1    | 16/79 |
| 2  | SNRNP200 | 1 | 2     | 4.68 | 0.08 | -0.02 | 3.74 | 27/79 |
| 2  | KRT17    | 1 | 2     | 4.66 | 0.08 | 0.66  | 1.51 | 11/79 |
| 1  | UCHL3    | 1 | 1     | 4.81 | 0.08 | 0.03  | 1.17 | 4/79  |
| 1  | PRPF31   | 1 | 1     | 4.53 | 0.08 | 0.03  | 1.04 | 4/79  |
| 19 | KRT10    | 2 | 20,18 | 4.36 | 0.07 | -0.35 | 1    | 79/79 |
| 18 | TUBB2C   | 2 | 15,20 | 4.24 | 0.07 | -0.29 | 1    | 79/79 |
| 9  | FASN     | 2 | 7,10  | 4.17 | 0.07 | 1.35  | 1    | 57/79 |
| 6  | KRT5     | 2 | 6,6   | 4.01 | 0.07 | 0.2   | 1.12 | 54/79 |
| 5  | TTN      | 2 | 5,4   | 4.02 | 0.07 | 2.24  | 1    | 44/79 |
| 4  | PKM2     | 2 | 2,5   | 4.06 | 0.07 | 0.24  | 1.41 | 55/79 |
| 3  | IRS4     | 2 | 2,3   | 4.07 | 0.07 | 0.2   | 1.04 | 35/79 |
| 2  | CCT8     | 2 | 1,2   | 4.42 | 0.07 | -0.17 | 1.54 | 39/79 |
| 1  | YLPM1    | 1 | 1     | 4.44 | 0.07 | 3.24  | 1    | 4/79  |
| 1  | USP15    | 2 | 1,1   | 4.13 | 0.07 | -0.11 | 1.57 | 30/79 |
| 2  | MYBBP1A  | 2 | 1,2   | 3.99 | 0.07 | 0.25  | 1    | 28/79 |
| 1  | MCM4     | 1 | 1     | 3.91 | 0.07 | 0.41  | 1.74 | 9/79  |
| 2  | RPA1     | 1 | 2     | 4.45 | 0.07 | 5.25  | 1    | 8/79  |
| 2  | LMNB1    | 1 | 2     | 3.97 | 0.07 | 4     | 1    | 10/79 |
| 2  | DSG1     | 1 | 2     | 3.97 | 0.07 | 0.75  | 1.2  | 12/79 |
| 1  | PLRG1    | 1 | 1     | 3.97 | 0.07 | 3.76  | 1    | 5/79  |
| 1  | CALML5   | 1 | 1     | 4.44 | 0.07 | 3.24  | 1    | 4/79  |
| 1  | NOC3L    | 1 | 1     | 4.44 | 0.07 | 2.63  | 1    | 4/79  |
| 1  | CLNS1A   | 1 | 1     | 4.44 | 0.07 | 4.32  | 1    | 4/79  |
| 1  | COPS8    | 1 | 1     | 4.37 | 0.07 | 0.17  | 1.21 | 5/79  |

|    |              |   |       |      |      |       |      |       |
|----|--------------|---|-------|------|------|-------|------|-------|
| 1  | CBR3         | 1 | 1     | 4.44 | 0.07 | 4.32  | 1    | 4/79  |
| 1  | RRS1         | 1 | 1     | 4.44 | 0.07 | 4.32  | 1    | 4/79  |
| 1  | FAM120A      | 1 | 1     | 4.44 | 0.07 | 3.24  | 1    | 4/79  |
| 1  | SF3A1        | 1 | 1     | 3.97 | 0.07 | 3.76  | 1    | 5/79  |
| 1  | TIMM23       | 1 | 1     | 4.44 | 0.07 | 4.32  | 1    | 4/79  |
| 1  | ANKRD52      | 1 | 1     | 3.97 | 0.07 | 2.53  | 1    | 5/79  |
| 14 | KRT2         | 2 | 15,13 | 3.78 | 0.06 | -0.17 | 1    | 78/79 |
| 11 | HSPA5        | 2 | 12,9  | 3.32 | 0.06 | -0.97 | 1    | 79/79 |
| 13 | TFG          | 2 | 12,13 | 3.61 | 0.06 | -1.24 | 1    | 79/79 |
| 13 | NCL          | 2 | 15,10 | 3.71 | 0.06 | -0.78 | 1    | 77/79 |
| 9  | HNRNPM       | 2 | 7,10  | 3.42 | 0.06 | 0.74  | 1    | 69/79 |
| 5  | TUFM         | 2 | 3,6   | 3.53 | 0.06 | 1.73  | 1    | 50/79 |
| 2  | PPP2CA       | 2 | 1,2   | 3.72 | 0.06 | 1.05  | 1    | 30/79 |
| 1  | CKB          | 1 | 1     | 3.36 | 0.06 | 1.56  | 1    | 7/79  |
| 1  | PRPF8        | 1 | 1     | 3.4  | 0.06 | -0.08 | 4.09 | 28/79 |
| 2  | PHGDH        | 2 | 1,3   | 3.38 | 0.06 | 0.98  | 1    | 33/79 |
| 1  | HAT1         | 1 | 1     | 3.59 | 0.06 | 0.01  | 2.61 | 16/79 |
| 1  | EIF4A3       | 2 | 1,1   | 3.59 | 0.06 | 0.95  | 1    | 22/79 |
| 4  | DDX6         | 1 | 4     | 3.41 | 0.06 | 1.39  | 1.36 | 37/79 |
| 2  | YWHAE        | 1 | 2     | 3.67 | 0.06 | -0.08 | 2.73 | 32/79 |
| 2  | RARS         | 1 | 2     | 3.63 | 0.06 | 3.46  | 1    | 12/79 |
| 1  | HDAC2        | 1 | 1     | 3.63 | 0.06 | 2.76  | 1    | 6/79  |
| 1  | EIF3E        | 1 | 1     | 3.75 | 0.06 | -0.12 | 1.96 | 11/79 |
| 1  | CBX1         | 1 | 1     | 3.63 | 0.06 | 1.98  | 1    | 6/79  |
| 1  | EIF3CL;EIF3C | 1 | 1     | 3.51 | 0.06 | -0.13 | 2.34 | 15/79 |
| 1  | CALM1        | 1 | 1     | 3.84 | 0.06 | 0.83  | 1.12 | 6/79  |
| 1  | PSMD11       | 1 | 1     | 3.5  | 0.06 | -0.17 | 1.55 | 10/79 |
| 1  | KEAP1        | 1 | 1     | 3.68 | 0.06 | -0.08 | 1.37 | 8/79  |
| 1  | POLRMT       | 1 | 1     | 3.36 | 0.06 | 2.65  | 1    | 7/79  |
| 1  | PSMD6        | 1 | 1     | 3.68 | 0.06 | -0.17 | 1.2  | 7/79  |
| 1  | MCM6         | 1 | 1     | 3.36 | 0.06 | 0.91  | 1    | 7/79  |
| 1  | NPEPPS       | 1 | 1     | 3.36 | 0.06 | 3.14  | 1    | 7/79  |
| 8  | DHX9         | 2 | 6,10  | 2.86 | 0.05 | -0.94 | 1    | 78/79 |
| 8  | HSPA1A       | 2 | 7,8   | 2.83 | 0.05 | -1.52 | 1    | 79/79 |
| 9  | HSPA9        | 2 | 6,11  | 3    | 0.05 | -0.89 | 1    | 79/79 |
| 5  | HSPH1        | 2 | 5,4   | 3.26 | 0.05 | 0.53  | 1    | 54/79 |
| 10 | HNRNPA2B1    | 2 | 8,11  | 3.16 | 0.05 | -0.51 | 1    | 79/79 |
| 8  | TUBA4A       | 2 | 6,9   | 2.91 | 0.05 | -0.34 | 1    | 77/79 |
| 5  | HSPA4        | 2 | 4,6   | 2.95 | 0.05 | -0.16 | 1    | 60/79 |
| 3  | CCT5         | 1 | 3     | 2.87 | 0.05 | 0.1   | 1.66 | 48/79 |
| 3  | DNAJA1       | 2 | 2,4   | 2.86 | 0.05 | 0.25  | 1    | 48/79 |
| 4  | PDIA6        | 2 | 2,5   | 2.92 | 0.05 | 2.35  | 1    | 54/79 |
| 3  | RUVBL2       | 2 | 2,3   | 3.26 | 0.05 | 0.43  | 1    | 42/79 |

|   |         |   |     |      |      |       |      |       |
|---|---------|---|-----|------|------|-------|------|-------|
| 2 | GNL3    | 1 | 2   | 3.14 | 0.05 | 3.07  | 1    | 16/79 |
| 2 | CTPS    | 2 | 1,2 | 2.97 | 0.05 | 0.2   | 1.14 | 43/79 |
| 1 | PSMC4   | 1 | 1   | 3.14 | 0.05 | -0.11 | 2.12 | 17/79 |
| 3 | RPL19   | 2 | 1,4 | 3.05 | 0.05 | 1.36  | 1    | 45/79 |
| 1 | RCC2    | 2 | 1,1 | 3.04 | 0.05 | 0.42  | 1    | 26/79 |
| 1 | PSMC1   | 1 | 1   | 3.13 | 0.05 | -0.11 | 2.11 | 17/79 |
| 1 | EIF6    | 1 | 1   | 3.14 | 0.05 | 3     | 1    | 8/79  |
| 1 | COPA    | 1 | 1   | 3.14 | 0.05 | 1.65  | 1    | 8/79  |
| 2 | RUVBL1  | 2 | 1,2 | 3.28 | 0.05 | 0.38  | 1    | 34/79 |
| 4 | TUBB2A  | 1 | 4   | 3.01 | 0.05 | 1.49  | 1    | 35/79 |
| 5 | PTBP1   | 1 | 5   | 3.11 | 0.05 | 1.91  | 1    | 41/79 |
| 3 | YWHAQ   | 1 | 3   | 3.12 | 0.05 | 0.8   | 1.27 | 31/79 |
| 2 | CDC5L   | 1 | 2   | 3.19 | 0.05 | 1.01  | 1.22 | 19/79 |
| 2 | UPF1    | 1 | 2   | 2.88 | 0.05 | 2.52  | 1    | 19/79 |
| 1 | ZC3HAV1 | 1 | 1   | 3.14 | 0.05 | 1.83  | 1    | 8/79  |
| 1 | PURA    | 1 | 1   | 3.14 | 0.05 | 3     | 1    | 8/79  |
| 1 | YTHDF2  | 1 | 1   | 2.96 | 0.05 | 2.35  | 1    | 9/79  |
| 1 | C1orf77 | 1 | 1   | 3.14 | 0.05 | 3     | 1    | 8/79  |
| 1 | PSMD3   | 1 | 1   | 3.1  | 0.05 | -0.18 | 1.94 | 16/79 |
| 1 | HRNR    | 1 | 1   | 3.14 | 0.05 | 1.77  | 1    | 8/79  |
| 1 | G3BP1   | 1 | 1   | 2.91 | 0.05 | -0.05 | 3.12 | 29/79 |
| 1 | SMC4    | 1 | 1   | 2.96 | 0.05 | 1.85  | 1    | 9/79  |
| 1 | PLEC1   | 1 | 1   | 3.14 | 0.05 | 2.18  | 1    | 8/79  |
| 1 | EXOSC9  | 1 | 1   | 3.14 | 0.05 | 1.91  | 1    | 8/79  |
| 1 | LRPPRC  | 1 | 1   | 3.14 | 0.05 | 2.47  | 1    | 8/79  |
| 1 | HSD17B4 | 1 | 1   | 2.96 | 0.05 | 1.71  | 1    | 9/79  |
| 6 | NPM1    | 2 | 7,4 | 2.57 | 0.04 | 0.24  | 1    | 75/79 |
| 7 | HNRNPK  | 2 | 7,7 | 2.65 | 0.04 | -0.81 | 1    | 79/79 |
| 5 | HNRNPU  | 2 | 5,5 | 2.26 | 0.04 | -0.7  | 1    | 78/79 |
| 7 | TUBB    | 2 | 7,7 | 2.65 | 0.04 | -0.37 | 1    | 79/79 |
| 5 | RPLP2   | 2 | 5,4 | 2.24 | 0.04 | -0.39 | 1    | 79/79 |
| 6 | RPLP0   | 2 | 5,6 | 2.47 | 0.04 | -0.16 | 1    | 78/79 |
| 4 | IGF2BP1 | 2 | 4,4 | 2.28 | 0.04 | -0.08 | 1    | 69/79 |
| 7 | PABPC1  | 2 | 4,9 | 2.67 | 0.04 | -0.98 | 1    | 78/79 |
| 5 | EEF2    | 2 | 4,5 | 2.48 | 0.04 | 0.25  | 1    | 71/79 |
| 4 | RPS14   | 2 | 3,5 | 2.26 | 0.04 | 1.5   | 1    | 70/79 |
| 5 | HNRNPC  | 2 | 5,4 | 2.6  | 0.04 | 0.79  | 1.02 | 69/79 |
| 4 | PRDX1   | 2 | 3,5 | 2.1  | 0.04 | -0.16 | 1    | 75/79 |
| 4 | YBX1    | 2 | 2,6 | 2.26 | 0.04 | 1.95  | 1    | 70/79 |
| 4 | ACTB    | 2 | 2,5 | 2.44 | 0.04 | 1.22  | 1    | 65/79 |
| 4 | ILF3    | 2 | 3,5 | 2.2  | 0.04 | -0.2  | 1    | 72/79 |
| 2 | POLR2A  | 1 | 2   | 2.29 | 0.04 | 0.89  | 1    | 30/79 |
| 3 | MATR3   | 2 | 2,4 | 2.58 | 0.04 | 0.51  | 1    | 53/79 |

|   |              |   |     |      |      |       |      |       |
|---|--------------|---|-----|------|------|-------|------|-------|
| 4 | DDX21        | 2 | 2,5 | 2.22 | 0.04 | -0.45 | 1    | 71/79 |
| 3 | THOC4        | 2 | 2,3 | 2.49 | 0.04 | 0.86  | 1    | 55/79 |
| 2 | PCNA         | 2 | 1,3 | 2.55 | 0.04 | 0.75  | 1    | 44/79 |
| 1 | ENO2         | 1 | 1   | 2.3  | 0.04 | 2.08  | 1    | 15/79 |
| 1 | SRPK1        | 1 | 1   | 2.16 | 0.04 | 0.8   | 1    | 17/79 |
| 1 | ALDH18A1     | 1 | 1   | 2.47 | 0.04 | 0.19  | 1.86 | 24/79 |
| 1 | STRAP        | 2 | 1,1 | 2.55 | 0.04 | 0.65  | 1    | 31/79 |
| 1 | HSD17B10     | 1 | 1   | 2.1  | 0.04 | 0.42  | 1.39 | 25/79 |
| 1 | TARDBP       | 1 | 1   | 2.47 | 0.04 | 1.33  | 1    | 13/79 |
| 1 | DDB1         | 1 | 1   | 2.29 | 0.04 | -0.18 | 3.12 | 47/79 |
| 2 | TRIM28       | 2 | 1,3 | 2.38 | 0.04 | 0.48  | 1    | 47/79 |
| 1 | RPS15        | 2 | 1,1 | 2.39 | 0.04 | 0.12  | 1    | 33/79 |
| 3 | HSP90AB1     | 2 | 2,4 | 2.16 | 0.04 | 0.08  | 1.02 | 65/79 |
| 1 | ACTR1A       | 1 | 1   | 2.57 | 0.04 | 2.36  | 1    | 12/79 |
| 1 | EXOSC2       | 1 | 1   | 2.1  | 0.04 | 1.44  | 1    | 18/79 |
| 3 | SF3B3        | 2 | 1,4 | 2.53 | 0.04 | 0.77  | 1    | 54/79 |
| 1 | WDR68        | 1 | 1   | 2.3  | 0.04 | 1.66  | 1    | 15/79 |
| 1 | YWHAG        | 1 | 1   | 2.37 | 0.04 | 0.47  | 1    | 14/79 |
| 2 | HIST1H2AB    | 2 | 1,2 | 2.55 | 0.04 | 0.84  | 1    | 44/79 |
| 1 | POLDIP2      | 1 | 1   | 2.1  | 0.04 | 0.92  | 1    | 18/79 |
| 1 | PTCD3        | 1 | 1   | 2.14 | 0.04 | 0.65  | 1.1  | 19/79 |
| 3 | AIFM1        | 2 | 1,5 | 2.63 | 0.04 | 0.19  | 1    | 52/79 |
| 1 | STUB1        | 1 | 1   | 2.3  | 0.04 | 0.26  | 1    | 15/79 |
| 1 | NOP2         | 2 | 1,1 | 2.26 | 0.04 | -0.06 | 1    | 35/79 |
| 2 | MCM3         | 1 | 2   | 2.62 | 0.04 | 0.38  | 1.31 | 30/79 |
| 2 | HNRNPUL2     | 1 | 2   | 2.33 | 0.04 | 2.26  | 1    | 29/79 |
| 2 | FTSJ3        | 1 | 2   | 2.13 | 0.04 | 0.92  | 1    | 35/79 |
| 1 | BOLA2;BOLA2B | 1 | 1   | 2.68 | 0.04 | 2.13  | 1    | 11/79 |
| 1 | KRT6C        | 1 | 1   | 2.47 | 0.04 | 1.4   | 1    | 13/79 |
| 1 | TUBB3        | 1 | 1   | 2.47 | 0.04 | 1.76  | 1    | 13/79 |
| 1 | NOP56        | 1 | 1   | 2.3  | 0.04 | 1.66  | 1    | 15/79 |
| 1 | TUBB2B       | 1 | 1   | 2.3  | 0.04 | 1.66  | 1    | 15/79 |
| 1 | SF3B4        | 1 | 1   | 2.3  | 0.04 | 1.86  | 1    | 15/79 |
| 1 | ZNF326       | 1 | 1   | 2.16 | 0.04 | 1.55  | 1    | 17/79 |
| 1 | SERPINB12    | 1 | 1   | 2.22 | 0.04 | 1.31  | 1    | 16/79 |
| 1 | MAT2A        | 1 | 1   | 2.37 | 0.04 | 1.45  | 1    | 14/79 |
| 1 | RRP1B        | 1 | 1   | 2.22 | 0.04 | 1.16  | 1    | 16/79 |
| 1 | MAPK1        | 1 | 1   | 2.47 | 0.04 | 0.94  | 1    | 13/79 |
| 1 | KRT3         | 1 | 1   | 2.47 | 0.04 | 1.37  | 1    | 13/79 |
| 1 | SF3B1        | 1 | 1   | 2.16 | 0.04 | 1.04  | 1    | 17/79 |
| 1 | MCM5         | 1 | 1   | 2.44 | 0.04 | 0.09  | 1.58 | 21/79 |
| 1 | USP9X        | 1 | 1   | 2.35 | 0.04 | 0.05  | 1.54 | 22/79 |
| 1 | PPP2R2A      | 1 | 1   | 2.3  | 0.04 | 0.7   | 1    | 15/79 |



|   |              |   |     |      |      |       |      |       |
|---|--------------|---|-----|------|------|-------|------|-------|
| 1 | MRPS5        | 1 | 1   | 2.3  | 0.04 | 1.12  | 1    | 15/79 |
| 1 | CFL1         | 1 | 1   | 2.47 | 0.04 | 1.5   | 1    | 13/79 |
| 3 | HNRNPF       | 2 | 4,2 | 1.73 | 0.03 | -1.44 | 1    | 79/79 |
| 4 | HNRNPH1      | 2 | 5,3 | 2    | 0.03 | -0.98 | 1    | 79/79 |
| 3 | DDX5         | 2 | 4,1 | 1.73 | 0.03 | -1.28 | 1    | 79/79 |
| 3 | LGALS3BP     | 2 | 3,3 | 1.96 | 0.03 | -0.54 | 1.09 | 76/79 |
| 4 | DDX3X        | 2 | 3,5 | 2    | 0.03 | -1.66 | 1    | 79/79 |
| 3 | CSDA         | 2 | 3,2 | 1.78 | 0.03 | -0.61 | 1    | 77/79 |
| 2 | RPL8         | 2 | 3,1 | 1.6  | 0.03 | 0.09  | 1    | 70/79 |
| 3 | RPL7A        | 2 | 3,2 | 1.85 | 0.03 | -0.29 | 1    | 74/79 |
| 3 | FUS          | 2 | 2,3 | 1.73 | 0.03 | -1.44 | 1    | 79/79 |
| 3 | HNRNPH3      | 2 | 2,3 | 1.75 | 0.03 | -1.2  | 1    | 78/79 |
| 3 | HNRNPA1      | 2 | 2,3 | 1.73 | 0.03 | -0.55 | 1    | 79/79 |
| 2 | RPS6         | 2 | 2,2 | 1.84 | 0.03 | 0.03  | 1    | 61/79 |
| 3 | DNAJC10      | 2 | 2,3 | 1.8  | 0.03 | -0.55 | 1    | 76/79 |
| 2 | RPS8         | 2 | 2,2 | 1.56 | 0.03 | -0.5  | 1    | 72/79 |
| 2 | HNRNPL       | 2 | 2,1 | 1.7  | 0.03 | -0.28 | 1    | 66/79 |
| 3 | KRT75        | 2 | 2,3 | 1.97 | 0.03 | 0.16  | 1    | 69/79 |
| 2 | RPS7         | 2 | 2,1 | 1.92 | 0.03 | -0.07 | 1    | 58/79 |
| 2 | ELAVL1       | 2 | 2,1 | 1.67 | 0.03 | -0.09 | 1    | 67/79 |
| 2 | HNRNPR       | 2 | 2,1 | 1.57 | 0.03 | -0.5  | 1    | 71/79 |
| 2 | SLC25A5      | 2 | 2,1 | 1.77 | 0.03 | -0.22 | 1    | 63/79 |
| 2 | HIST1H1C     | 2 | 2,2 | 1.51 | 0.03 | -0.55 | 1    | 74/79 |
| 4 | HSPA1L       | 2 | 4,4 | 2    | 0.03 | -1.32 | 1    | 79/79 |
| 1 | GRSF1        | 1 | 1   | 1.6  | 0.03 | 0.54  | 1    | 31/79 |
| 2 | RPS2         | 2 | 1,2 | 1.53 | 0.03 | -0.86 | 1    | 73/79 |
| 2 | HSPD1        | 2 | 1,3 | 1.99 | 0.03 | -0.4  | 1    | 56/79 |
| 2 | DHX15        | 2 | 1,2 | 1.51 | 0.03 | -0.78 | 1    | 74/79 |
| 3 | HNRNPUL1     | 2 | 1,5 | 1.73 | 0.03 | -1.6  | 1    | 79/79 |
| 2 | RPL5         | 2 | 1,3 | 1.51 | 0.03 | -0.92 | 1    | 74/79 |
| 2 | HIST2H2BE    | 2 | 1,2 | 1.67 | 0.03 | -0.06 | 1    | 67/79 |
| 1 | TUBB4        | 1 | 1   | 1.81 | 0.03 | 0.46  | 1    | 24/79 |
| 1 | PDHB         | 1 | 1   | 1.89 | 0.03 | 1.02  | 1    | 22/79 |
| 1 | RPS27        | 1 | 1   | 1.6  | 0.03 | 0.44  | 1    | 31/79 |
| 1 | MCCC2        | 1 | 1   | 1.99 | 0.03 | 0.88  | 1    | 20/79 |
| 1 | RBM39        | 1 | 1   | 1.71 | 0.03 | 0.64  | 1    | 27/79 |
| 2 | RPL7;RPL7P32 | 2 | 1,2 | 1.56 | 0.03 | -0.58 | 1    | 72/79 |
| 1 | SERBP1       | 2 | 1,1 | 1.88 | 0.03 | 0.13  | 1    | 42/79 |
| 1 | MRPS22       | 1 | 1   | 1.52 | 0.03 | 0.06  | 1    | 34/79 |
| 2 | RPL30        | 2 | 1,3 | 2.04 | 0.03 | 0.26  | 1    | 55/79 |
| 1 | DYNC1H1      | 1 | 1   | 2.04 | 0.03 | 0.2   | 1    | 19/79 |
| 2 | HNRNPCL1     | 2 | 1,2 | 1.7  | 0.03 | 0.21  | 1    | 66/79 |
| 1 | EEF1B2       | 2 | 1,1 | 1.61 | 0.03 | 0.36  | 1    | 49/79 |

|   |          |   |     |      |      |       |      |       |
|---|----------|---|-----|------|------|-------|------|-------|
| 1 | DNAJA2   | 1 | 1   | 1.62 | 0.03 | -0.02 | 1    | 30/79 |
| 2 | RPS10    | 2 | 1,3 | 1.67 | 0.03 | -0.15 | 1    | 67/79 |
| 1 | RPL27A   | 2 | 1,1 | 1.61 | 0.03 | -0.05 | 1    | 49/79 |
| 3 | TUBA1C   | 1 | 3   | 1.74 | 0.03 | -0.63 | 1    | 78/79 |
| 3 | RPL4     | 1 | 3   | 1.74 | 0.03 | -0.44 | 1    | 78/79 |
| 2 | HSP90AA1 | 1 | 2   | 1.66 | 0.03 | -0.27 | 1.19 | 68/79 |
| 2 | MTHFD1   | 1 | 2   | 2.06 | 0.03 | 0.26  | 1.05 | 39/79 |
| 2 | RPL24    | 1 | 2   | 1.52 | 0.03 | -0.07 | 1    | 68/79 |
| 2 | HSP90B1  | 1 | 2   | 1.85 | 0.03 | 1.13  | 1    | 46/79 |
| 2 | RPL9     | 1 | 2   | 1.57 | 0.03 | -0.39 | 1    | 64/79 |
| 2 | SFRS7    | 1 | 2   | 1.57 | 0.03 | 0.2   | 1    | 64/79 |
| 2 | EEF1G    | 1 | 2   | 2.07 | 0.03 | 1.61  | 1    | 37/79 |
| 2 | RPL23    | 1 | 2   | 1.52 | 0.03 | -0.19 | 1    | 68/79 |
| 2 | GAPDH    | 1 | 2   | 1.56 | 0.03 | 0.37  | 1    | 65/79 |
| 1 | SSBP1    | 1 | 1   | 1.54 | 0.03 | 0.19  | 1.11 | 37/79 |
| 1 | CARM1    | 1 | 1   | 1.6  | 0.03 | 0.17  | 1.07 | 33/79 |
| 1 | KHDRBS1  | 1 | 1   | 1.57 | 0.03 | 0.55  | 1    | 32/79 |
| 1 | RPL37A   | 1 | 1   | 1.52 | 0.03 | 0.45  | 1    | 34/79 |
| 1 | ADAR     | 1 | 1   | 2.04 | 0.03 | 1.2   | 1    | 19/79 |
| 1 | LYAR     | 1 | 1   | 1.62 | 0.03 | 0.35  | 1    | 30/79 |
| 1 | HIST1H4J | 1 | 1   | 1.57 | 0.03 | 0.48  | 1    | 32/79 |
| 1 | ATP1A2   | 1 | 1   | 2.04 | 0.03 | 0.68  | 1    | 19/79 |
| 1 | AHSA1    | 1 | 1   | 1.68 | 0.03 | 0.71  | 1    | 28/79 |
| 1 | UGCGL1   | 1 | 1   | 1.72 | 0.03 | -0.01 | 1.12 | 30/79 |
| 1 | NSUN2    | 1 | 1   | 1.99 | 0.03 | 1.06  | 1    | 20/79 |
| 1 | SEC16A   | 1 | 1   | 1.55 | 0.03 | -0.15 | 1.31 | 43/79 |
| 1 | PPIA     | 1 | 1   | 1.65 | 0.03 | 1.09  | 1    | 29/79 |
| 1 | FLG2     | 1 | 1   | 1.71 | 0.03 | 0.36  | 1    | 27/79 |
| 1 | OLA1     | 1 | 1   | 1.94 | 0.03 | 1.14  | 1    | 21/79 |
| 1 | RBM28    | 1 | 1   | 1.85 | 0.03 | 0.65  | 1    | 23/79 |
| 1 | SEC24A   | 1 | 1   | 1.62 | 0.03 | 0.84  | 1    | 30/79 |
| 1 | ATP5B    | 1 | 1   | 1.74 | 0.03 | 0.28  | 1    | 26/79 |
| 1 | PRMT5    | 1 | 1   | 1.99 | 0.03 | 0.62  | 1    | 20/79 |
| 1 | GNB2L1   | 1 | 1   | 1.62 | 0.03 | 0.2   | 1    | 30/79 |
| 1 | PUF60    | 1 | 1   | 1.65 | 0.03 | 0.45  | 1    | 29/79 |
| 2 | HNRNPA3  | 2 | 2,1 | 1.47 | 0.02 | -0.97 | 1    | 76/79 |
| 2 | ILF2     | 2 | 1,3 | 1.48 | 0.02 | -0.66 | 1    | 75/79 |
| 2 | HNRNPD   | 2 | 1,2 | 1.43 | 0.02 | -0.93 | 1    | 78/79 |
| 2 | HNRNPAB  | 2 | 2,2 | 1.43 | 0.02 | -0.94 | 1    | 78/79 |
| 1 | C1QBP    | 1 | 1   | 1.02 | 0.02 | -0.89 | 1    | 75/79 |
| 1 | ACTBL2   | 2 | 1,1 | 1.22 | 0.02 | -0.29 | 1    | 65/79 |
| 1 | RPL22    | 2 | 1,1 | 1.23 | 0.02 | -0.28 | 1    | 64/79 |
| 2 | RPL3     | 2 | 1,3 | 1.48 | 0.02 | -0.57 | 1    | 75/79 |

|   |           |   |     |      |      |       |      |       |
|---|-----------|---|-----|------|------|-------|------|-------|
| 1 | RPS17     | 2 | 1,1 | 1.49 | 0.02 | -0.35 | 1    | 53/79 |
| 1 | UBC       | 2 | 1,1 | 1.47 | 0.02 | -0.51 | 1.37 | 74/79 |
| 2 | RPS4X     | 2 | 1,2 | 1.48 | 0.02 | -0.79 | 1    | 75/79 |
| 1 | HSPA7     | 2 | 1,1 | 1.03 | 0.02 | -1.92 | 1    | 77/79 |
| 1 | RPL12     | 2 | 1,1 | 1.16 | 0.02 | -0.76 | 1    | 68/79 |
| 1 | RBBP4     | 1 | 1   | 1.33 | 0.02 | 0.32  | 1    | 45/79 |
| 1 | SFRS2     | 2 | 1,1 | 1.32 | 0.02 | -0.16 | 1    | 60/79 |
| 1 | PRDX3     | 1 | 1   | 1.39 | 0.02 | 0.39  | 1    | 41/79 |
| 2 | RPL6      | 2 | 1,3 | 1.47 | 0.02 | -1.04 | 1    | 76/79 |
| 1 | RPL31     | 2 | 1,1 | 1.11 | 0.02 | -0.7  | 1    | 71/79 |
| 1 | RPL10A    | 1 | 1   | 1.14 | 0.02 | -0.48 | 1    | 61/79 |
| 1 | EEF1A1    | 1 | 1   | 1.05 | 0.02 | -0.75 | 1    | 71/79 |
| 1 | RPS13     | 2 | 1,1 | 1.23 | 0.02 | -0.74 | 1    | 64/79 |
| 1 | RPLP1     | 1 | 1   | 1.01 | 0.02 | -0.97 | 1    | 77/79 |
| 1 | RPS23     | 2 | 1,1 | 1.32 | 0.02 | -0.15 | 1    | 60/79 |
| 1 | RPL36AP37 | 1 | 1   | 1.05 | 0.02 | -0.91 | 1    | 71/79 |
| 1 | TIA1      | 2 | 1,1 | 1.16 | 0.02 | -0.87 | 1    | 68/79 |
| 2 | RPL15     | 2 | 1,2 | 1.48 | 0.02 | -0.59 | 1    | 75/79 |
| 1 | RPL13A    | 2 | 1,1 | 1.23 | 0.02 | -0.27 | 1    | 64/79 |
| 1 | RPL18     | 1 | 1   | 1.03 | 0.02 | -0.97 | 1    | 74/79 |
| 1 | RPS24     | 2 | 1,1 | 1.04 | 0.02 | -1.14 | 1    | 76/79 |
| 1 | ATP5A1    | 2 | 1,1 | 1.46 | 0.02 | -0.44 | 1    | 54/79 |
| 1 | LOC646057 | 2 | 1,1 | 1.08 | 0.02 | -1.07 | 1    | 73/79 |
| 1 | TUBB1     | 1 | 1   | 1.06 | 0.02 | -0.81 | 1    | 70/79 |
| 1 | C22orf28  | 1 | 1   | 1.02 | 0.02 | -1.2  | 1    | 75/79 |
| 1 | RPL27     | 2 | 1,1 | 1.1  | 0.02 | -0.82 | 1    | 72/79 |
| 2 | RPS3      | 2 | 1,3 | 1.41 | 0.02 | -1.26 | 1    | 79/79 |
| 1 | SNRPD3    | 2 | 1,1 | 1.1  | 0.02 | -0.53 | 1    | 72/79 |
| 2 | HNRPDL    | 2 | 1,2 | 1.48 | 0.02 | -0.78 | 1    | 75/79 |
| 1 | RPL11     | 1 | 1   | 1    | 0.02 | -0.82 | 1    | 78/79 |
| 1 | RPL23A    | 2 | 1,1 | 1.2  | 0.02 | -0.6  | 1    | 66/79 |
| 1 | RPS3A     | 1 | 1   | 1.12 | 0.02 | -0.65 | 1    | 63/79 |
| 1 | HNRNPA0   | 2 | 1,1 | 1.25 | 0.02 | -0.39 | 1    | 63/79 |
| 2 | EWSR1     | 1 | 2   | 1.44 | 0.02 | -1.27 | 1    | 77/79 |
| 2 | TAF15     | 1 | 2   | 1.41 | 0.02 | -1.27 | 1    | 79/79 |
| 2 | EEF1A2    | 1 | 2   | 1.44 | 0.02 | -0.67 | 1    | 76/79 |
| 2 | TIAL1     | 1 | 2   | 1.44 | 0.02 | -1.25 | 1    | 76/79 |
| 1 | TRA2B     | 1 | 1   | 1.37 | 0.02 | 0.56  | 1    | 42/79 |
| 1 | SYNCRIP   | 1 | 1   | 1.09 | 0.02 | -0.92 | 1    | 67/79 |
| 1 | SDHA      | 1 | 1   | 1.11 | 0.02 | -0.43 | 1    | 64/79 |
| 1 | LOC652595 | 1 | 1   | 1.2  | 0.02 | -0.31 | 1    | 55/79 |
| 1 | RPL21P19  | 1 | 1   | 1.02 | 0.02 | -0.93 | 1    | 75/79 |
| 1 | RPL14     | 1 | 1   | 1.27 | 0.02 | 0.15  | 1    | 49/79 |

|   |            |   |   |      |      |       |      |       |
|---|------------|---|---|------|------|-------|------|-------|
| 1 | RBMXL2     | 1 | 1 | 1.23 | 0.02 | 0.11  | 1    | 52/79 |
| 1 | FAM98A     | 1 | 1 | 1.17 | 0.02 | -0.42 | 1    | 58/79 |
| 1 | CCBL2      | 1 | 1 | 1.39 | 0.02 | 0.53  | 1    | 41/79 |
| 1 | SLC25A6    | 1 | 1 | 1.48 | 0.02 | -0.12 | 1    | 36/79 |
| 1 | BAG4       | 1 | 1 | 1.05 | 0.02 | -1.03 | 1    | 72/79 |
| 1 | RPS19      | 1 | 1 | 1.18 | 0.02 | -0.58 | 1    | 57/79 |
| 1 | NONO       | 1 | 1 | 1.23 | 0.02 | 0.22  | 1    | 52/79 |
| 1 | DAZAP1     | 1 | 1 | 1    | 0.02 | -1.37 | 1    | 79/79 |
| 1 | NAP1L1     | 1 | 1 | 1.1  | 0.02 | -0.49 | 1    | 65/79 |
| 1 | STRBP      | 1 | 1 | 1.27 | 0.02 | -0.08 | 1    | 49/79 |
| 1 | RBM14;RBM4 | 1 | 1 | 1.1  | 0.02 | -0.72 | 1    | 65/79 |
| 1 | RPS15A     | 1 | 1 | 1.08 | 0.02 | -0.51 | 1    | 68/79 |
| 1 | LUC7L2     | 1 | 1 | 1.41 | 0.02 | 0.14  | 1    | 40/79 |
| 1 | KRT13      | 1 | 1 | 1.32 | 0.02 | -0.27 | 1.14 | 52/79 |
| 1 | DDX17      | 1 | 1 | 1    | 0.02 | -1.39 | 1    | 78/79 |
| 1 | TXN        | 1 | 1 | 1.13 | 0.02 | -0.46 | 1    | 62/79 |
| 1 | SNRPD1     | 1 | 1 | 1.02 | 0.02 | -1.59 | 1    | 76/79 |
| 1 | PABPN1     | 1 | 1 | 1.27 | 0.02 | 0.35  | 1    | 49/79 |
| 1 | HSP90AA2   | 1 | 1 | 1.17 | 0.02 | -0.29 | 1    | 58/79 |
| 1 | RPS16      | 1 | 1 | 1    | 0.02 | -0.86 | 1    | 78/79 |
| 1 | RPS25      | 1 | 1 | 1.1  | 0.02 | -0.67 | 1    | 65/79 |
| 1 | RPL7AP27   | 1 | 1 | 1.12 | 0.02 | -0.37 | 1    | 63/79 |

## Dataset S2: BPV1 E2TR CompPASS Analysis

| TSC | SYMBOL     | FOUND<br>IN | TSCs  | WD-<br>SCORE | NWD-<br>SCORE | Z-<br>SCORE | WF   | RATIO |
|-----|------------|-------------|-------|--------------|---------------|-------------|------|-------|
| 80  | BPV1_E2    | 2           | 83,76 | 235.5        | 4             | 7.6         | 1    | 3/79  |
| 42  | USP5       | 2           | 39,45 | 113.52       | 1.93          | 4.04        | 1.33 | 6/79  |
| 2   | PRSS3      | 2           | 2,2   | 111.72       | 1.9           | 8.57        | 1    | 1/79  |
| 2   | SPOP       | 2           | 2,2   | 111.72       | 1.9           | 8.57        | 1    | 1/79  |
| 2   | CASK       | 2           | 1,2   | 111.72       | 1.9           | 8.57        | 1    | 1/79  |
| 5   | ILK-2;CCT4 | 2           | 6,4   | 88.32        | 1.5           | 6.79        | 1    | 2/79  |
| 1   | RAD18      | 2           | 1,1   | 79           | 1.34          | 9           | 1    | 1/79  |
| 1   | TFCP2      | 2           | 1,1   | 79           | 1.34          | 9           | 1    | 1/79  |
| 1   | ATG4B      | 2           | 1,1   | 79           | 1.34          | 9           | 1    | 1/79  |
| 6   | TRMT61B    | 2           | 4,8   | 64.5         | 1.1           | 7.93        | 1    | 3/79  |
| 2   | IMPDH1     | 2           | 2,1   | 55.86        | 0.95          | 7.84        | 1    | 2/79  |
| 2   | RABGGTB    | 2           | 2,1   | 55.86        | 0.95          | 6.09        | 1    | 2/79  |
| 2   | SQSTM1     | 2           | 1,2   | 55.86        | 0.95          | 7.84        | 1    | 2/79  |
| 2   | COPS5      | 2           | 2,1   | 53.35        | 0.91          | 0.04        | 1.91 | 4/79  |
| 1   | SIRT1      | 2           | 1,1   | 51.75        | 0.88          | 0.24        | 1.31 | 2/79  |
| 3   | DLAT       | 2           | 3,2   | 45.6         | 0.77          | 7.95        | 1    | 3/79  |
| 2   | FLNB       | 2           | 1,2   | 45.25        | 0.77          | 0.61        | 1.62 | 4/79  |
| 4   | UCHL3      | 2           | 3,4   | 42.66        | 0.72          | 0.57        | 1.08 | 4/79  |
| 1   | OGDH       | 2           | 1,1   | 41.87        | 0.71          | 1.14        | 1.06 | 2/79  |
| 1   | SAPS1      | 2           | 1,1   | 39.5         | 0.67          | 3.84        | 1    | 2/79  |
| 1   | WDR26      | 2           | 1,1   | 39.5         | 0.67          | 6.06        | 1    | 2/79  |
| 1   | PSMB3      | 2           | 1,1   | 39.5         | 0.67          | 6.06        | 1    | 2/79  |
| 1   | TBC1D4     | 2           | 1,1   | 39.5         | 0.67          | 6.06        | 1    | 2/79  |
| 2   | GYS1       | 2           | 3,1   | 37.24        | 0.63          | 5.88        | 1    | 3/79  |
| 2   | GLDC       | 2           | 2,1   | 37.24        | 0.63          | 7.22        | 1    | 3/79  |
| 2   | PDE12      | 2           | 1,3   | 37.24        | 0.63          | 7.22        | 1    | 3/79  |
| 2   | MTAP       | 2           | 1,2   | 37.24        | 0.63          | 7.22        | 1    | 3/79  |
| 1   | HCFC1      | 2           | 1,1   | 34.29        | 0.58          | -0.08       | 2.17 | 5/79  |
| 7   | FLNA       | 2           | 6,7   | 33.62        | 0.57          | 0.55        | 2.09 | 13/79 |
| 2   | FLNC       | 2           | 1,3   | 33.74        | 0.57          | -0.08       | 3.02 | 10/79 |
| 3   | COPS4      | 2           | 4,2   | 30.97        | 0.53          | -0.07       | 1.81 | 8/79  |
| 2   | COPS3      | 2           | 1,2   | 31.28        | 0.53          | -0.03       | 1.12 | 4/79  |
| 1   | MYH9       | 2           | 1,1   | 31.44        | 0.53          | 0.05        | 1.99 | 5/79  |
| 5   | USP7       | 2           | 6,4   | 27.45        | 0.47          | 0.33        | 2.64 | 17/79 |
| 2   | EEF1D      | 2           | 1,2   | 27.93        | 0.47          | 5.49        | 1    | 4/79  |
| 2   | ACACA      | 2           | 1,2   | 27.93        | 0.47          | 6.69        | 1    | 4/79  |
| 2   | DOCK7      | 2           | 1,3   | 27.93        | 0.47          | 5.49        | 1    | 4/79  |
| 4   | GSTP1      | 2           | 3,4   | 26.34        | 0.45          | 7.63        | 1    | 6/79  |
| 1   | ACBD3      | 2           | 1,1   | 26.33        | 0.45          | 5.05        | 1    | 3/79  |
| 1   | GTF2I      | 2           | 1,1   | 26.33        | 0.45          | 1.96        | 1    | 3/79  |

|    |          |   |       |       |      |       |      |       |
|----|----------|---|-------|-------|------|-------|------|-------|
| 1  | KPNA2    | 2 | 1,1   | 26.33 | 0.45 | 3.52  | 1    | 3/79  |
| 3  | PSMD1    | 2 | 5,1   | 23.27 | 0.4  | -0.07 | 2.21 | 13/79 |
| 2  | PSMD14   | 2 | 2,1   | 23.63 | 0.4  | 0     | 1.48 | 7/79  |
| 2  | ANKRD52  | 2 | 2,1   | 22.34 | 0.38 | 4.63  | 1    | 5/79  |
| 2  | IKBKAP   | 2 | 2,1   | 22.34 | 0.38 | 3.94  | 1    | 5/79  |
| 2  | MCM4     | 2 | 1,2   | 20.49 | 0.35 | 0.98  | 1.65 | 9/79  |
| 1  | IARS     | 2 | 1,1   | 19.75 | 0.34 | 4.32  | 1    | 4/79  |
| 1  | SARS2    | 2 | 1,1   | 19.75 | 0.34 | 4.32  | 1    | 4/79  |
| 3  | SNRNP200 | 2 | 3,3   | 18.88 | 0.32 | 0.04  | 3.72 | 27/79 |
| 2  | PSME3    | 2 | 2,2   | 18.63 | 0.32 | 4.07  | 1    | 6/79  |
| 1  | COPS8    | 2 | 1,1   | 19.12 | 0.32 | 0.17  | 1.21 | 5/79  |
| 2  | PSMD11   | 2 | 1,2   | 17.21 | 0.29 | -0.14 | 1.54 | 10/79 |
| 4  | PSMC3    | 2 | 4,3   | 16.75 | 0.28 | 0.07  | 2.12 | 20/79 |
| 3  | PSMC1    | 2 | 3,3   | 16.75 | 0.28 | 0.07  | 2.08 | 17/79 |
| 2  | PSMD13   | 2 | 1,3   | 16.65 | 0.28 | -0.1  | 1.49 | 10/79 |
| 3  | PSMC5    | 2 | 4,2   | 16    | 0.27 | -0.02 | 2.22 | 19/79 |
| 1  | IGF2BP2  | 2 | 1,1   | 15.8  | 0.27 | 3.76  | 1    | 5/79  |
| 6  | IMPDH2   | 2 | 6,5   | 14.89 | 0.25 | 5.8   | 1    | 13/79 |
| 2  | SAPS3    | 2 | 2,1   | 13.97 | 0.24 | 1.04  | 1    | 8/79  |
| 2  | GTF3C1   | 2 | 1,2   | 13.97 | 0.24 | 5.25  | 1    | 8/79  |
| 4  | EIF4A1   | 2 | 4,3   | 13.31 | 0.23 | 0.42  | 2.61 | 31/79 |
| 2  | PSMD3    | 2 | 2,2   | 13.55 | 0.23 | -0.15 | 1.94 | 16/79 |
| 2  | PSMC2    | 2 | 2,2   | 13.27 | 0.23 | -0.03 | 1.9  | 16/79 |
| 2  | PSMD4    | 2 | 1,2   | 13.5  | 0.23 | 0.23  | 1.57 | 13/79 |
| 1  | PSMD6    | 2 | 1,1   | 13.55 | 0.23 | -0.17 | 1.2  | 7/79  |
| 1  | POLR2C   | 2 | 1,1   | 13.17 | 0.22 | 3.41  | 1    | 6/79  |
| 2  | EDC4     | 1 | 2     | 12.57 | 0.21 | 8.57  | 1    | 1/79  |
| 2  | PSMB4    | 1 | 2     | 12.57 | 0.21 | 8.57  | 1    | 1/79  |
| 2  | PPM1G    | 2 | 1,2   | 12.42 | 0.21 | 1.82  | 1    | 9/79  |
| 4  | ALDH18A1 | 2 | 5,2   | 11.58 | 0.2  | 1.52  | 1.76 | 24/79 |
| 1  | ANXA7    | 2 | 1,1   | 11.29 | 0.19 | 3.14  | 1    | 7/79  |
| 2  | DSG1     | 2 | 1,2   | 11.17 | 0.19 | 0.75  | 1.2  | 12/79 |
| 1  | CPNE7    | 2 | 1,1   | 11.29 | 0.19 | 3.14  | 1    | 7/79  |
| 3  | GARS     | 2 | 2,3   | 10.53 | 0.18 | 4.78  | 1    | 13/79 |
| 4  | XRCC6    | 2 | 3,4   | 9.88  | 0.17 | 3.06  | 1    | 16/79 |
| 1  | PSMC4    | 2 | 1,1   | 9.86  | 0.17 | -0.11 | 2.12 | 17/79 |
| 1  | PFAS     | 2 | 1,1   | 9.88  | 0.17 | 2.47  | 1    | 8/79  |
| 4  | DSP      | 2 | 4,4   | 9.69  | 0.16 | 0.17  | 1.9  | 31/79 |
| 3  | USP9X    | 2 | 3,2   | 9.26  | 0.16 | 0.74  | 1.49 | 22/79 |
| 4  | CCT7     | 2 | 3,4   | 9.7   | 0.16 | 0.31  | 1.72 | 28/79 |
| 2  | YWHAE    | 2 | 2,1   | 9.54  | 0.16 | -0.08 | 2.73 | 32/79 |
| 2  | ACTR1A   | 2 | 1,2   | 9.31  | 0.16 | 4.49  | 1    | 12/79 |
| 11 | AGL      | 2 | 10,11 | 9.03  | 0.15 | 2.2   | 1.48 | 43/79 |

|   |            |   |     |      |      |      |      |       |
|---|------------|---|-----|------|------|------|------|-------|
| 5 | CCT3       | 2 | 4,6 | 8.59 | 0.15 | 0.76 | 1.46 | 30/79 |
| 2 | DLD        | 2 | 2,1 | 8.6  | 0.15 | 2.44 | 1    | 13/79 |
| 1 | RCC1       | 1 | 1   | 8.89 | 0.15 | 9    | 1    | 1/79  |
| 1 | PPP6C      | 2 | 1,1 | 8.78 | 0.15 | 1.39 | 1    | 9/79  |
| 1 | GTF3C3     | 1 | 1   | 8.89 | 0.15 | 9    | 1    | 1/79  |
| 1 | DHPS       | 1 | 1   | 8.89 | 0.15 | 9    | 1    | 1/79  |
| 1 | FLJ25613   | 1 | 1   | 8.89 | 0.15 | 9    | 1    | 1/79  |
| 1 | KIF1B      | 1 | 1   | 8.89 | 0.15 | 9    | 1    | 1/79  |
| 1 | SARS       | 1 | 1   | 8.89 | 0.15 | 9    | 1    | 1/79  |
| 1 | ERBB2IP    | 1 | 1   | 8.89 | 0.15 | 9    | 1    | 1/79  |
| 1 | COPB1      | 2 | 1,1 | 8.78 | 0.15 | 2.78 | 1    | 9/79  |
| 1 | CCDC137    | 1 | 1   | 8.89 | 0.15 | 9    | 1    | 1/79  |
| 1 | SOX18      | 1 | 1   | 8.89 | 0.15 | 9    | 1    | 1/79  |
| 1 | MAT2B      | 1 | 1   | 8.89 | 0.15 | 9    | 1    | 1/79  |
| 2 | KCTD12     | 2 | 1,3 | 8.6  | 0.15 | 2.54 | 1    | 13/79 |
| 1 | TCF25      | 1 | 1   | 8.89 | 0.15 | 9    | 1    | 1/79  |
| 1 | TERF2IP    | 1 | 1   | 8.89 | 0.15 | 9    | 1    | 1/79  |
| 1 | EYA3       | 1 | 1   | 8.89 | 0.15 | 9    | 1    | 1/79  |
| 1 | CDC42EP1   | 1 | 1   | 8.89 | 0.15 | 9    | 1    | 1/79  |
| 1 | ELP3       | 1 | 1   | 8.89 | 0.15 | 9    | 1    | 1/79  |
| 1 | WDR62      | 1 | 1   | 8.89 | 0.15 | 9    | 1    | 1/79  |
| 1 | BIRC6      | 1 | 1   | 8.89 | 0.15 | 9    | 1    | 1/79  |
| 1 | CDK5       | 1 | 1   | 8.89 | 0.15 | 9    | 1    | 1/79  |
| 1 | GTF3C2     | 1 | 1   | 8.89 | 0.15 | 9    | 1    | 1/79  |
| 2 | DLST;DLSTP | 1 | 2   | 8.89 | 0.15 | 6.09 | 1    | 2/79  |
| 1 | FTSJ1      | 1 | 1   | 8.89 | 0.15 | 9    | 1    | 1/79  |
| 1 | ATE1       | 1 | 1   | 8.89 | 0.15 | 9    | 1    | 1/79  |
| 1 | AIMP2      | 1 | 1   | 8.89 | 0.15 | 9    | 1    | 1/79  |
| 1 | MMACHC     | 1 | 1   | 8.89 | 0.15 | 9    | 1    | 1/79  |
| 1 | SPAG9      | 1 | 1   | 8.89 | 0.15 | 9    | 1    | 1/79  |
| 1 | GLO1       | 1 | 1   | 8.89 | 0.15 | 9    | 1    | 1/79  |
| 1 | CA8        | 1 | 1   | 8.89 | 0.15 | 9    | 1    | 1/79  |
| 1 | SETDB1     | 1 | 1   | 8.89 | 0.15 | 9    | 1    | 1/79  |
| 1 | ANKRD44    | 1 | 1   | 8.89 | 0.15 | 9    | 1    | 1/79  |
| 1 | IGHA1      | 1 | 1   | 8.89 | 0.15 | 9    | 1    | 1/79  |
| 1 | VPS33A     | 1 | 1   | 8.89 | 0.15 | 9    | 1    | 1/79  |
| 1 | MLF2       | 1 | 1   | 8.89 | 0.15 | 9    | 1    | 1/79  |
| 1 | PUS7       | 1 | 1   | 8.89 | 0.15 | 9    | 1    | 1/79  |
| 1 | ZNF276     | 1 | 1   | 8.89 | 0.15 | 9    | 1    | 1/79  |
| 1 | THBS1      | 1 | 1   | 8.89 | 0.15 | 9    | 1    | 1/79  |
| 1 | ALDH7A1    | 1 | 1   | 8.89 | 0.15 | 9    | 1    | 1/79  |
| 1 | RANGRF     | 1 | 1   | 8.89 | 0.15 | 9    | 1    | 1/79  |
| 1 | UBXN7      | 1 | 1   | 8.89 | 0.15 | 9    | 1    | 1/79  |

|    |          |   |       |      |      |       |      |       |
|----|----------|---|-------|------|------|-------|------|-------|
| 1  | NARS     | 1 | 1     | 8.89 | 0.15 | 9     | 1    | 1/79  |
| 1  | THUMPD3  | 1 | 1     | 8.89 | 0.15 | 9     | 1    | 1/79  |
| 1  | NCKAP1   | 1 | 1     | 8.89 | 0.15 | 9     | 1    | 1/79  |
| 7  | TCP1     | 2 | 8,6   | 8.23 | 0.14 | 0.72  | 1.34 | 34/79 |
| 6  | CCT2     | 2 | 5,6   | 8.52 | 0.14 | 0.3   | 1.85 | 42/79 |
| 3  | HUWE1    | 2 | 4,1   | 8    | 0.14 | 0.46  | 1.11 | 19/79 |
| 5  | XRCC5    | 2 | 4,5   | 8.03 | 0.14 | 3.93  | 1    | 22/79 |
| 3  | KRT16    | 2 | 3,3   | 7.95 | 0.14 | 0.05  | 2.03 | 35/79 |
| 2  | SPTBN1   | 2 | 2,1   | 7.45 | 0.13 | 2.97  | 1    | 15/79 |
| 1  | PSMC6    | 2 | 1,1   | 7.44 | 0.13 | -0.11 | 2.26 | 24/79 |
| 1  | PAICS    | 2 | 1,1   | 7.9  | 0.13 | 1.16  | 1    | 10/79 |
| 3  | SNRNP40  | 1 | 3     | 7.94 | 0.13 | 1.98  | 1.33 | 5/79  |
| 32 | CAD      | 2 | 33,31 | 6.96 | 0.12 | 1.8   | 1    | 64/79 |
| 3  | PRMT5    | 2 | 4,2   | 6.84 | 0.12 | 2.65  | 1    | 20/79 |
| 3  | WDR6     | 1 | 3     | 6.88 | 0.12 | 7.28  | 1    | 5/79  |
| 5  | AHCY     | 2 | 3,6   | 7.33 | 0.12 | 0.9   | 1.95 | 47/79 |
| 3  | HSD17B10 | 2 | 1,4   | 7.28 | 0.12 | 1.89  | 1.33 | 25/79 |
| 1  | DCP1A    | 1 | 1     | 6.83 | 0.12 | 0.69  | 1.18 | 2/79  |
| 1  | COPS6    | 1 | 1     | 7.25 | 0.12 | 0.16  | 1.33 | 2/79  |
| 2  | CDC5L    | 2 | 1,2   | 7.18 | 0.12 | 1.01  | 1.22 | 19/79 |
| 1  | HECTD1   | 1 | 1     | 7    | 0.12 | 0.47  | 1.24 | 2/79  |
| 6  | KRT14    | 2 | 6,6   | 6.24 | 0.11 | 0.68  | 1.48 | 46/79 |
| 3  | CCT6A    | 2 | 3,3   | 6.33 | 0.11 | 0.11  | 1.48 | 32/79 |
| 4  | CCT8     | 2 | 3,5   | 6.21 | 0.11 | 0.08  | 1.53 | 39/79 |
| 1  | DDX20    | 1 | 1     | 6.28 | 0.11 | 6.06  | 1    | 2/79  |
| 1  | MDN1     | 1 | 1     | 6.28 | 0.11 | 6.06  | 1    | 2/79  |
| 1  | C1orf50  | 1 | 1     | 6.28 | 0.11 | 6.06  | 1    | 2/79  |
| 1  | GPHN     | 1 | 1     | 6.28 | 0.11 | 6.06  | 1    | 2/79  |
| 1  | PPAT     | 1 | 1     | 6.28 | 0.11 | 6.06  | 1    | 2/79  |
| 1  | GNL3L    | 1 | 1     | 6.28 | 0.11 | 3.84  | 1    | 2/79  |
| 1  | AAMP     | 2 | 1,1   | 6.58 | 0.11 | 2.05  | 1    | 12/79 |
| 1  | PPIL4    | 1 | 1     | 6.28 | 0.11 | 6.06  | 1    | 2/79  |
| 1  | PPP4C    | 1 | 1     | 6.28 | 0.11 | 3.84  | 1    | 2/79  |
| 1  | TPR      | 1 | 1     | 6.28 | 0.11 | 6.06  | 1    | 2/79  |
| 1  | ARIH2    | 1 | 1     | 6.28 | 0.11 | 3.84  | 1    | 2/79  |
| 1  | NCAPD2   | 1 | 1     | 6.28 | 0.11 | 6.06  | 1    | 2/79  |
| 1  | KRT6B    | 2 | 1,1   | 6.61 | 0.11 | 0.07  | 1.59 | 19/79 |
| 1  | GSPT1    | 1 | 1     | 6.28 | 0.11 | 6.06  | 1    | 2/79  |
| 1  | FLII     | 1 | 1     | 6.28 | 0.11 | 6.06  | 1    | 2/79  |
| 1  | PSMB1    | 1 | 1     | 6.28 | 0.11 | 6.06  | 1    | 2/79  |
| 1  | NUDCD1   | 1 | 1     | 6.47 | 0.11 | 1.14  | 1.06 | 2/79  |
| 1  | MRPS14   | 1 | 1     | 6.28 | 0.11 | 6.06  | 1    | 2/79  |
| 1  | RARS     | 2 | 1,1   | 6.58 | 0.11 | 1.69  | 1    | 12/79 |



|    |             |   |       |      |      |       |      |       |
|----|-------------|---|-------|------|------|-------|------|-------|
| 1  | GPN3        | 1 | 1     | 6.28 | 0.11 | 6.06  | 1    | 2/79  |
| 1  | CAPZA1      | 1 | 1     | 6.28 | 0.11 | 6.06  | 1    | 2/79  |
| 1  | CKMT1B      | 1 | 1     | 6.28 | 0.11 | 3.84  | 1    | 2/79  |
| 1  | MGEA5       | 1 | 1     | 6.28 | 0.11 | 2.71  | 1    | 2/79  |
| 1  | NDUFS1      | 1 | 1     | 6.28 | 0.11 | 2.04  | 1    | 2/79  |
| 1  | CLTA        | 1 | 1     | 6.28 | 0.11 | 6.06  | 1    | 2/79  |
| 1  | RRM1        | 1 | 1     | 6.28 | 0.11 | 6.06  | 1    | 2/79  |
| 1  | AP2B1       | 1 | 1     | 6.28 | 0.11 | 6.06  | 1    | 2/79  |
| 1  | TAF9        | 1 | 1     | 6.28 | 0.11 | 3.84  | 1    | 2/79  |
| 1  | MYCBP       | 1 | 1     | 6.28 | 0.11 | 1.61  | 1    | 2/79  |
| 1  | COPG2       | 1 | 1     | 6.28 | 0.11 | 6.06  | 1    | 2/79  |
| 1  | JMJD6       | 1 | 1     | 6.28 | 0.11 | 6.06  | 1    | 2/79  |
| 1  | C20orf4     | 1 | 1     | 6.28 | 0.11 | 6.06  | 1    | 2/79  |
| 1  | TPI1;RCTPI1 | 1 | 1     | 6.28 | 0.11 | 6.06  | 1    | 2/79  |
| 1  | TRAF2       | 1 | 1     | 6.28 | 0.11 | 6.06  | 1    | 2/79  |
| 1  | TK1         | 1 | 1     | 6.28 | 0.11 | 6.06  | 1    | 2/79  |
| 34 | KRT1        | 2 | 35,33 | 5.83 | 0.1  | 0.04  | 1    | 79/79 |
| 12 | VIM         | 2 | 13,11 | 5.72 | 0.1  | 2.73  | 1    | 48/79 |
| 3  | YWHAQ       | 2 | 3,2   | 5.61 | 0.1  | 0.8   | 1.27 | 31/79 |
| 1  | CFL1        | 2 | 1,1   | 6.08 | 0.1  | 1.5   | 1    | 13/79 |
| 1  | TARDBP      | 2 | 1,1   | 6.08 | 0.1  | 1.33  | 1    | 13/79 |
| 1  | DCD         | 2 | 1,1   | 6.08 | 0.1  | 1.42  | 1    | 13/79 |
| 2  | RNH1        | 1 | 2     | 5.62 | 0.1  | 3.6   | 1    | 5/79  |
| 2  | DICER1      | 1 | 2     | 5.62 | 0.1  | 6.19  | 1    | 5/79  |
| 1  | AHCYL1      | 1 | 1     | 6.16 | 0.1  | 0.43  | 1.44 | 3/79  |
| 26 | HSPA8       | 2 | 29,23 | 5.1  | 0.09 | -1.08 | 1    | 79/79 |
| 30 | KRT10       | 2 | 29,30 | 5.48 | 0.09 | 0.13  | 1    | 79/79 |
| 14 | FASN        | 2 | 15,12 | 5.2  | 0.09 | 2.48  | 1    | 57/79 |
| 3  | PRKDC       | 2 | 3,3   | 5.47 | 0.09 | 0.45  | 1    | 25/79 |
| 2  | FXR1        | 2 | 2,1   | 5.08 | 0.09 | 1.49  | 1    | 22/79 |
| 2  | ACLY        | 2 | 2,1   | 5.59 | 0.09 | 1.62  | 1    | 20/79 |
| 2  | EIF3A       | 1 | 2     | 5.54 | 0.09 | -0.12 | 2.14 | 11/79 |
| 2  | KIAA1967    | 2 | 2,2   | 5.08 | 0.09 | 1.62  | 1    | 22/79 |
| 2  | OLA1        | 2 | 1,3   | 5.32 | 0.09 | 2.68  | 1    | 21/79 |
| 1  | LSM2        | 1 | 1     | 5.13 | 0.09 | 0.89  | 1    | 3/79  |
| 1  | ANAPC1      | 1 | 1     | 5.13 | 0.09 | 5.05  | 1    | 3/79  |
| 1  | ELP2        | 1 | 1     | 5.13 | 0.09 | 5.05  | 1    | 3/79  |
| 1  | MRPL37      | 1 | 1     | 5.13 | 0.09 | 5.05  | 1    | 3/79  |
| 1  | NME1;NME2   | 1 | 1     | 5.13 | 0.09 | 5.05  | 1    | 3/79  |
| 2  | ANKRD28     | 1 | 2     | 5.13 | 0.09 | 2.59  | 1    | 6/79  |
| 1  | GPRASP2     | 1 | 1     | 5.13 | 0.09 | 5.05  | 1    | 3/79  |
| 1  | DHX40       | 1 | 1     | 5.13 | 0.09 | 5.05  | 1    | 3/79  |
| 1  | NUP133      | 1 | 1     | 5.13 | 0.09 | 5.05  | 1    | 3/79  |

|    |          |   |       |      |      |       |      |       |
|----|----------|---|-------|------|------|-------|------|-------|
| 1  | IKBKG    | 1 | 1     | 5.13 | 0.09 | 5.05  | 1    | 3/79  |
| 1  | RPIA     | 1 | 1     | 5.13 | 0.09 | 3.52  | 1    | 3/79  |
| 1  | PRPF4B   | 1 | 1     | 5.39 | 0.09 | 0.6   | 1.47 | 4/79  |
| 1  | PDXK     | 1 | 1     | 5.13 | 0.09 | 5.05  | 1    | 3/79  |
| 1  | BAT2D1   | 1 | 1     | 5.13 | 0.09 | 5.05  | 1    | 3/79  |
| 1  | RPS18    | 1 | 1     | 5.13 | 0.09 | 0.6   | 1    | 3/79  |
| 1  | SAPS2    | 1 | 1     | 5.13 | 0.09 | 5.05  | 1    | 3/79  |
| 23 | KRT2     | 2 | 17,28 | 4.84 | 0.08 | 0.35  | 1    | 78/79 |
| 3  | CCT5     | 2 | 4,1   | 4.74 | 0.08 | 0.1   | 1.66 | 48/79 |
| 4  | RUVBL1   | 2 | 3,4   | 4.64 | 0.08 | 1.34  | 1    | 34/79 |
| 2  | MCM3     | 2 | 2,1   | 4.87 | 0.08 | 0.38  | 1.31 | 30/79 |
| 2  | PSMD12   | 1 | 2     | 4.74 | 0.08 | -0.15 | 1.99 | 14/79 |
| 2  | EFTUD2   | 1 | 2     | 4.89 | 0.08 | 0.14  | 2.57 | 17/79 |
| 2  | RPA1     | 1 | 2     | 4.45 | 0.08 | 5.25  | 1    | 8/79  |
| 2  | PSMD2    | 1 | 2     | 4.59 | 0.08 | -0.1  | 2.13 | 16/79 |
| 2  | PCBP2    | 2 | 2,1   | 4.65 | 0.08 | 2.3   | 1    | 24/79 |
| 2  | LRPPRC   | 1 | 2     | 4.45 | 0.08 | 4.68  | 1    | 8/79  |
| 1  | YWHAZ    | 2 | 1,1   | 4.47 | 0.08 | 0.14  | 1.19 | 21/79 |
| 2  | UBA1     | 1 | 2     | 4.45 | 0.08 | 5.25  | 1    | 8/79  |
| 1  | ZFR      | 1 | 1     | 4.44 | 0.08 | 2.42  | 1    | 4/79  |
| 1  | COPS2    | 1 | 1     | 4.72 | 0.08 | -0.1  | 1.13 | 4/79  |
| 1  | SND1     | 1 | 1     | 4.44 | 0.08 | 4.32  | 1    | 4/79  |
| 2  | KRT17    | 1 | 2     | 4.66 | 0.08 | 0.66  | 1.51 | 11/79 |
| 2  | MCM6     | 1 | 2     | 4.75 | 0.08 | 1.98  | 1    | 7/79  |
| 1  | UBE2L3   | 1 | 1     | 4.44 | 0.08 | 4.32  | 1    | 4/79  |
| 1  | AASDHPPT | 1 | 1     | 4.44 | 0.08 | 1.86  | 1    | 4/79  |
| 1  | UCHL5    | 1 | 1     | 4.72 | 0.08 | 0.55  | 1.13 | 4/79  |
| 1  | CALML5   | 1 | 1     | 4.44 | 0.08 | 3.24  | 1    | 4/79  |
| 1  | SLC25A11 | 1 | 1     | 4.44 | 0.08 | 4.32  | 1    | 4/79  |
| 16 | TUBB2C   | 2 | 16,15 | 4    | 0.07 | -0.43 | 1    | 79/79 |
| 14 | KRT9     | 2 | 12,15 | 4.36 | 0.07 | 0.05  | 1.08 | 73/79 |
| 4  | PKM2     | 2 | 5,3   | 4.06 | 0.07 | 0.24  | 1.41 | 55/79 |
| 3  | SEC16A   | 2 | 3,2   | 4.08 | 0.07 | 0.55  | 1.28 | 43/79 |
| 3  | MAT2A    | 1 | 3     | 4.11 | 0.07 | 4.51  | 1    | 14/79 |
| 1  | PSMD7    | 1 | 1     | 3.98 | 0.07 | -0.1  | 1.6  | 8/79  |
| 1  | CALM1    | 1 | 1     | 3.84 | 0.07 | 0.83  | 1.12 | 6/79  |
| 1  | EIF3D    | 1 | 1     | 4.05 | 0.07 | -0.06 | 2.08 | 10/79 |
| 1  | PPA1     | 1 | 1     | 3.97 | 0.07 | 3.76  | 1    | 5/79  |
| 1  | CUL5     | 1 | 1     | 3.97 | 0.07 | 2.28  | 1    | 5/79  |
| 1  | POLDIP2  | 2 | 1,1   | 4.39 | 0.07 | 0.92  | 1    | 18/79 |
| 1  | CSNK2A1  | 1 | 1     | 3.91 | 0.07 | 0.06  | 1.94 | 10/79 |
| 1  | CYFIP1   | 1 | 1     | 3.97 | 0.07 | 3.76  | 1    | 5/79  |
| 4  | EEF1G    | 2 | 1,6   | 4.28 | 0.07 | 3.69  | 1    | 37/79 |

|    |          |   |       |      |      |       |      |       |
|----|----------|---|-------|------|------|-------|------|-------|
| 2  | MRPS26   | 1 | 2     | 4.19 | 0.07 | 3.08  | 1    | 9/79  |
| 1  | NUP160   | 1 | 1     | 3.97 | 0.07 | 3.76  | 1    | 5/79  |
| 1  | PSMA6    | 1 | 1     | 3.97 | 0.07 | 2.28  | 1    | 5/79  |
| 1  | EIF3F    | 1 | 1     | 4.04 | 0.07 | 0.06  | 2.48 | 12/79 |
| 13 | TFG      | 2 | 16,10 | 3.61 | 0.06 | -1.24 | 1    | 79/79 |
| 10 | TUBA4A   | 2 | 8,12  | 3.26 | 0.06 | -0.13 | 1    | 77/79 |
| 4  | RUVBL2   | 2 | 6,2   | 3.76 | 0.06 | 0.77  | 1    | 42/79 |
| 3  | PTBP1    | 2 | 4,2   | 3.34 | 0.06 | 0.92  | 1    | 41/79 |
| 6  | MATR3    | 2 | 4,7   | 3.65 | 0.06 | 1.8   | 1    | 53/79 |
| 3  | CLTC     | 2 | 2,3   | 3.28 | 0.06 | -0.13 | 1.58 | 66/79 |
| 2  | STRAP    | 2 | 2,1   | 3.61 | 0.06 | 1.92  | 1    | 31/79 |
| 2  | MAPK1    | 1 | 2     | 3.49 | 0.06 | 2.16  | 1    | 13/79 |
| 2  | PPP2CA   | 2 | 2,1   | 3.72 | 0.06 | 1.05  | 1    | 30/79 |
| 2  | MRPS27   | 2 | 2,2   | 3.28 | 0.06 | 1.72  | 1    | 34/79 |
| 2  | PPP2R1A  | 1 | 2     | 3.25 | 0.06 | 1.04  | 1    | 15/79 |
| 2  | PRPH     | 1 | 2     | 3.49 | 0.06 | 3.22  | 1    | 13/79 |
| 2  | HIST1H4J | 2 | 2,2   | 3.49 | 0.06 | 1.6   | 1    | 32/79 |
| 1  | EIF5A    | 1 | 1     | 3.36 | 0.06 | 2.65  | 1    | 7/79  |
| 2  | SPTAN1   | 2 | 1,2   | 3.38 | 0.06 | 2.36  | 1    | 33/79 |
| 1  | AP1B1    | 1 | 1     | 3.63 | 0.06 | 3.41  | 1    | 6/79  |
| 1  | CPSF7    | 1 | 1     | 3.36 | 0.06 | 3.14  | 1    | 7/79  |
| 1  | PPP2R1B  | 1 | 1     | 3.36 | 0.06 | 2.65  | 1    | 7/79  |
| 1  | SF3A3    | 1 | 1     | 3.63 | 0.06 | 3.41  | 1    | 6/79  |
| 1  | EIF3L    | 1 | 1     | 3.82 | 0.06 | -0.12 | 2.22 | 12/79 |
| 1  | EXOSC6   | 1 | 1     | 3.36 | 0.06 | 3.14  | 1    | 7/79  |
| 1  | PIP      | 1 | 1     | 3.63 | 0.06 | 2.2   | 1    | 6/79  |
| 2  | SLC25A3  | 2 | 1,2   | 3.61 | 0.06 | 0.69  | 1    | 31/79 |
| 1  | SET      | 1 | 1     | 3.36 | 0.06 | 1.72  | 1    | 7/79  |
| 1  | CASP14   | 1 | 1     | 3.49 | 0.06 | 0.84  | 1.23 | 8/79  |
| 2  | RCN2     | 1 | 2     | 3.36 | 0.06 | 1.79  | 1    | 14/79 |
| 2  | CSDE1    | 1 | 2     | 3.63 | 0.06 | 4.04  | 1    | 12/79 |
| 2  | WDR68    | 1 | 2     | 3.25 | 0.06 | 3.47  | 1    | 15/79 |
| 2  | KRT77    | 1 | 2     | 3.79 | 0.06 | 1.24  | 1    | 11/79 |
| 1  | ANXA2    | 1 | 1     | 3.36 | 0.06 | 2.12  | 1    | 7/79  |
| 1  | NUP62    | 1 | 1     | 3.36 | 0.06 | 3.14  | 1    | 7/79  |
| 1  | SENP3    | 1 | 1     | 3.63 | 0.06 | 3.41  | 1    | 6/79  |
| 1  | BUB3     | 1 | 1     | 3.63 | 0.06 | 1.14  | 1    | 6/79  |
| 1  | YWHAB    | 1 | 1     | 3.62 | 0.06 | 0.42  | 1.16 | 7/79  |
| 1  | TP53     | 1 | 1     | 3.36 | 0.06 | 1.89  | 1    | 7/79  |
| 1  | HAT1     | 1 | 1     | 3.59 | 0.06 | 0.01  | 2.61 | 16/79 |
| 1  | SSRP1    | 1 | 1     | 3.63 | 0.06 | 2.76  | 1    | 6/79  |
| 1  | MKI67IP  | 1 | 1     | 3.36 | 0.06 | 3.14  | 1    | 7/79  |
| 1  | MRPS10   | 1 | 1     | 3.63 | 0.06 | 3.41  | 1    | 6/79  |

|    |           |   |       |      |      |       |      |       |
|----|-----------|---|-------|------|------|-------|------|-------|
| 1  | DNAJB6    | 1 | 1     | 3.63 | 0.06 | 3.41  | 1    | 6/79  |
| 1  | USP13     | 1 | 1     | 3.39 | 0.06 | 0.43  | 1.02 | 7/79  |
| 10 | HSPA5     | 2 | 10,10 | 3.16 | 0.05 | -1.04 | 1    | 79/79 |
| 8  | HNRNPM    | 2 | 9,6   | 3.22 | 0.05 | 0.55  | 1    | 69/79 |
| 9  | HSPA9     | 2 | 9,9   | 3    | 0.05 | -0.89 | 1    | 79/79 |
| 8  | HSPA1A    | 2 | 7,8   | 2.83 | 0.05 | -1.52 | 1    | 79/79 |
| 8  | HSPA1L    | 2 | 8,8   | 2.83 | 0.05 | -0.91 | 1    | 79/79 |
| 7  | EEF2      | 2 | 8,5   | 2.94 | 0.05 | 0.79  | 1    | 71/79 |
| 7  | NCL       | 2 | 7,6   | 2.73 | 0.05 | -1.2  | 1    | 77/79 |
| 3  | TTN       | 2 | 5,1   | 3.12 | 0.05 | 1.03  | 1    | 44/79 |
| 2  | SEC23B    | 1 | 2     | 3.1  | 0.05 | 1.28  | 1.22 | 20/79 |
| 2  | WDR77     | 1 | 2     | 3.05 | 0.05 | 2.87  | 1    | 17/79 |
| 2  | CTPS      | 2 | 2,2   | 2.97 | 0.05 | 0.2   | 1.14 | 43/79 |
| 2  | UPF1      | 1 | 2     | 2.88 | 0.05 | 2.52  | 1    | 19/79 |
| 3  | PRMT1     | 2 | 2,4   | 2.86 | 0.05 | 1.24  | 1    | 48/79 |
| 2  | NT5DC2    | 1 | 2     | 2.88 | 0.05 | 2.65  | 1    | 19/79 |
| 4  | PDIA6     | 2 | 2,5   | 2.92 | 0.05 | 2.35  | 1    | 54/79 |
| 1  | POLR2E    | 1 | 1     | 2.96 | 0.05 | 2.35  | 1    | 9/79  |
| 1  | NME1      | 1 | 1     | 2.96 | 0.05 | 2.05  | 1    | 9/79  |
| 1  | EIF2S3    | 1 | 1     | 2.81 | 0.05 | 1.98  | 1    | 10/79 |
| 3  | DNAJA1    | 2 | 1,4   | 2.86 | 0.05 | 0.25  | 1    | 48/79 |
| 1  | MSH2      | 1 | 1     | 2.87 | 0.05 | 0.77  | 1.15 | 11/79 |
| 1  | GTPBP1    | 1 | 1     | 3.14 | 0.05 | 3     | 1    | 8/79  |
| 1  | WDR18     | 1 | 1     | 3.14 | 0.05 | 2.47  | 1    | 8/79  |
| 1  | ERAL1     | 1 | 1     | 2.68 | 0.05 | 2.13  | 1    | 11/79 |
| 1  | NUP214    | 1 | 1     | 2.81 | 0.05 | 1.71  | 1    | 10/79 |
| 2  | TUBB2A    | 2 | 1,2   | 3.2  | 0.05 | 0.44  | 1    | 35/79 |
| 1  | LARP4     | 1 | 1     | 2.81 | 0.05 | 2.64  | 1    | 10/79 |
| 3  | PRPF19    | 1 | 3     | 2.86 | 0.05 | 2.12  | 1    | 29/79 |
| 3  | ATP5B     | 1 | 3     | 3.02 | 0.05 | 1.72  | 1    | 26/79 |
| 3  | MCM7      | 1 | 3     | 2.91 | 0.05 | 1.37  | 1    | 28/79 |
| 2  | AKAP8L    | 1 | 2     | 3.14 | 0.05 | 3.24  | 1    | 16/79 |
| 2  | EPRS      | 1 | 2     | 3.14 | 0.05 | 2.87  | 1    | 16/79 |
| 2  | HSP90AB2P | 1 | 2     | 2.68 | 0.05 | 1.64  | 1    | 22/79 |
| 1  | XPO1      | 1 | 1     | 3.14 | 0.05 | 2.47  | 1    | 8/79  |
| 1  | PLEC1     | 1 | 1     | 3.14 | 0.05 | 2.18  | 1    | 8/79  |
| 1  | RPN1      | 1 | 1     | 2.96 | 0.05 | 1.08  | 1    | 9/79  |
| 1  | P4HB      | 1 | 1     | 3.14 | 0.05 | 3     | 1    | 8/79  |
| 1  | PFDN2     | 1 | 1     | 3.14 | 0.05 | 2.47  | 1    | 8/79  |
| 1  | SF3B2     | 1 | 1     | 2.96 | 0.05 | 2.78  | 1    | 9/79  |
| 1  | MRPS35    | 1 | 1     | 3.14 | 0.05 | 1.65  | 1    | 8/79  |
| 6  | HNRNPU    | 2 | 8,3   | 2.47 | 0.04 | -0.58 | 1    | 78/79 |
| 5  | DHX15     | 2 | 6,3   | 2.39 | 0.04 | 0.05  | 1    | 74/79 |

|   |              |   |     |      |      |       |      |       |
|---|--------------|---|-----|------|------|-------|------|-------|
| 6 | RPLP0        | 2 | 6,6 | 2.47 | 0.04 | -0.16 | 1    | 78/79 |
| 4 | IGF2BP1      | 2 | 4,4 | 2.28 | 0.04 | -0.08 | 1    | 69/79 |
| 3 | SF3B3        | 2 | 4,1 | 2.53 | 0.04 | 0.77  | 1    | 54/79 |
| 3 | HSPD1        | 2 | 4,1 | 2.44 | 0.04 | -0.16 | 1    | 56/79 |
| 3 | HSPH1        | 2 | 4,2 | 2.53 | 0.04 | 0     | 1    | 54/79 |
| 5 | PRDX1        | 2 | 4,5 | 2.35 | 0.04 | 0.22  | 1    | 75/79 |
| 5 | HNRNPK       | 2 | 3,7 | 2.24 | 0.04 | -1.22 | 1    | 79/79 |
| 3 | ACTB         | 2 | 3,3 | 2.11 | 0.04 | 0.66  | 1    | 65/79 |
| 2 | TUFM         | 2 | 3,1 | 2.23 | 0.04 | 0.22  | 1    | 50/79 |
| 5 | RPL7;RPL7P32 | 2 | 5,4 | 2.46 | 0.04 | 0.42  | 1    | 72/79 |
| 6 | HNRNPA2B1    | 2 | 4,7 | 2.45 | 0.04 | -0.85 | 1    | 79/79 |
| 3 | HSPA4        | 2 | 2,4 | 2.29 | 0.04 | -0.46 | 1    | 60/79 |
| 2 | SLC25A6      | 1 | 2   | 2.09 | 0.04 | 0.4   | 1    | 36/79 |
| 2 | PUF60        | 1 | 2   | 2.33 | 0.04 | 1.49  | 1    | 29/79 |
| 4 | DDX21        | 2 | 2,5 | 2.22 | 0.04 | -0.45 | 1    | 71/79 |
| 2 | HIST1H2AB    | 2 | 1,2 | 2.55 | 0.04 | 0.84  | 1    | 44/79 |
| 2 | PCNA         | 2 | 1,3 | 2.55 | 0.04 | 0.75  | 1    | 44/79 |
| 3 | RPL9         | 2 | 1,4 | 2.13 | 0.04 | 0.04  | 1    | 64/79 |
| 1 | FAM120B      | 1 | 1   | 2.3  | 0.04 | 1.66  | 1    | 15/79 |
| 2 | U2AF2        | 2 | 1,2 | 2.28 | 0.04 | 0.62  | 1    | 49/79 |
| 1 | KRT78        | 1 | 1   | 2.22 | 0.04 | 0.75  | 1    | 16/79 |
| 1 | SMARCB1      | 1 | 1   | 2.47 | 0.04 | 1.5   | 1    | 13/79 |
| 1 | MRPS18B      | 1 | 1   | 2.57 | 0.04 | 1.59  | 1    | 12/79 |
| 2 | KRT5         | 2 | 1,2 | 2.35 | 0.04 | -0.37 | 1.14 | 54/79 |
| 3 | HSP90AB1     | 2 | 2,3 | 2.16 | 0.04 | 0.08  | 1.02 | 65/79 |
| 1 | PRDX6        | 1 | 1   | 2.3  | 0.04 | 1.66  | 1    | 15/79 |
| 1 | MRPS5        | 1 | 1   | 2.3  | 0.04 | 1.12  | 1    | 15/79 |
| 1 | RRP1B        | 1 | 1   | 2.22 | 0.04 | 1.16  | 1    | 16/79 |
| 1 | SRRM2        | 1 | 1   | 2.16 | 0.04 | 0.55  | 1    | 17/79 |
| 1 | DDB1         | 1 | 1   | 2.29 | 0.04 | -0.18 | 3.12 | 47/79 |
| 1 | CPSF2        | 1 | 1   | 2.3  | 0.04 | 1.41  | 1    | 15/79 |
| 1 | PPP2R2A      | 1 | 1   | 2.3  | 0.04 | 0.7   | 1    | 15/79 |
| 1 | TIMM50       | 1 | 1   | 2.16 | 0.04 | 0.68  | 1    | 17/79 |
| 1 | USP11        | 1 | 1   | 2.47 | 0.04 | -0.19 | 1.47 | 19/79 |
| 1 | ZNF326       | 1 | 1   | 2.16 | 0.04 | 1.55  | 1    | 17/79 |
| 1 | SKP1         | 1 | 1   | 2.08 | 0.04 | 0.27  | 1.15 | 21/79 |
| 1 | CAPRIN1      | 1 | 1   | 2.42 | 0.04 | -0.11 | 3.12 | 42/79 |
| 1 | C1orf57      | 1 | 1   | 2.37 | 0.04 | 0.69  | 1    | 14/79 |
| 1 | ENO2         | 1 | 1   | 2.3  | 0.04 | 2.08  | 1    | 15/79 |
| 1 | EBNA1BP2     | 1 | 1   | 2.1  | 0.04 | 0.74  | 1    | 18/79 |
| 1 | GNL3         | 1 | 1   | 2.22 | 0.04 | 1.41  | 1    | 16/79 |
| 1 | NXF1         | 1 | 1   | 2.16 | 0.04 | 1.71  | 1    | 17/79 |
| 1 | PTCD3        | 1 | 1   | 2.14 | 0.04 | 0.65  | 1.1  | 19/79 |

|   |          |   |     |      |      |       |      |       |
|---|----------|---|-----|------|------|-------|------|-------|
| 1 | PDCD11   | 1 | 1   | 2.57 | 0.04 | 1.82  | 1    | 12/79 |
| 3 | PABPC1   | 2 | 5,1 | 1.75 | 0.03 | -1.38 | 1    | 78/79 |
| 3 | ILF3     | 2 | 4,2 | 1.91 | 0.03 | -0.4  | 1    | 72/79 |
| 3 | RPL4     | 2 | 4,2 | 1.75 | 0.03 | -0.44 | 1    | 78/79 |
| 4 | HNRNPF   | 2 | 4,3 | 2    | 0.03 | -1.15 | 1    | 79/79 |
| 4 | DHX9     | 2 | 4,3 | 2.02 | 0.03 | -1.17 | 1    | 78/79 |
| 4 | TUBB     | 2 | 5,3 | 2    | 0.03 | -0.82 | 1    | 79/79 |
| 4 | HNRNPA1  | 2 | 5,2 | 2    | 0.03 | -0.27 | 1    | 79/79 |
| 4 | RPLP2    | 2 | 4,3 | 2    | 0.03 | -0.75 | 1    | 79/79 |
| 4 | HNRNPUL1 | 2 | 3,5 | 2    | 0.03 | -1.51 | 1    | 79/79 |
| 3 | RPL7A    | 2 | 3,2 | 1.85 | 0.03 | -0.29 | 1    | 74/79 |
| 3 | TUBA1C   | 2 | 4,1 | 1.75 | 0.03 | -0.63 | 1    | 78/79 |
| 3 | RPL3     | 2 | 3,3 | 1.82 | 0.03 | -0.29 | 1    | 75/79 |
| 3 | EEF1A2   | 2 | 3,3 | 1.8  | 0.03 | -0.46 | 1    | 76/79 |
| 3 | HNRNPH1  | 2 | 3,2 | 1.73 | 0.03 | -1.1  | 1    | 79/79 |
| 3 | NPM1     | 2 | 3,2 | 1.82 | 0.03 | -0.43 | 1    | 75/79 |
| 3 | RPL15    | 2 | 3,2 | 1.82 | 0.03 | -0.03 | 1    | 75/79 |
| 3 | RPS8     | 2 | 3,3 | 1.91 | 0.03 | -0.03 | 1    | 72/79 |
| 3 | DNAJC10  | 2 | 3,3 | 1.8  | 0.03 | -0.55 | 1    | 76/79 |
| 2 | C1QBP    | 2 | 2,2 | 1.48 | 0.03 | -0.68 | 1    | 75/79 |
| 3 | HNRNPC   | 2 | 3,2 | 2.03 | 0.03 | 0.14  | 1.03 | 69/79 |
| 3 | RPL12    | 2 | 2,3 | 2.01 | 0.03 | 0.35  | 1    | 68/79 |
| 3 | HNRNPH3  | 2 | 2,3 | 1.75 | 0.03 | -1.2  | 1    | 78/79 |
| 2 | RPL10A   | 2 | 2,2 | 1.84 | 0.03 | -0.04 | 1    | 61/79 |
| 3 | KRT75    | 2 | 2,4 | 1.97 | 0.03 | 0.16  | 1    | 69/79 |
| 3 | LGALS3BP | 2 | 2,3 | 1.96 | 0.03 | -0.54 | 1.09 | 76/79 |
| 2 | SLC25A5  | 2 | 2,1 | 1.77 | 0.03 | -0.22 | 1    | 63/79 |
| 2 | ILF2     | 2 | 2,2 | 1.48 | 0.03 | -0.66 | 1    | 75/79 |
| 3 | RPS10    | 2 | 2,4 | 2.04 | 0.03 | 0.34  | 1    | 67/79 |
| 2 | QPCT     | 1 | 2   | 1.85 | 0.03 | 0.29  | 1    | 46/79 |
| 3 | HNRNPR   | 2 | 2,3 | 1.92 | 0.03 | -0.27 | 1    | 71/79 |
| 2 | KHSRP    | 1 | 2   | 1.51 | 0.03 | -0.19 | 1    | 69/79 |
| 2 | UBC      | 2 | 2,1 | 2.06 | 0.03 | -0.33 | 1.36 | 74/79 |
| 2 | ELAVL1   | 1 | 2   | 1.54 | 0.03 | -0.09 | 1    | 67/79 |
| 2 | RPS26P54 | 1 | 2   | 1.78 | 0.03 | 1.33  | 1    | 50/79 |
| 1 | EEF1B2   | 2 | 1,1 | 1.61 | 0.03 | 0.36  | 1    | 49/79 |
| 1 | PCMT1    | 2 | 1,1 | 2.03 | 0.03 | 0.48  | 1    | 39/79 |
| 1 | RPS5     | 1 | 1   | 1.65 | 0.03 | 0.55  | 1    | 29/79 |
| 3 | DDX3X    | 2 | 1,5 | 1.73 | 0.03 | -1.78 | 1    | 79/79 |
| 1 | ENO1     | 1 | 1   | 2.04 | 0.03 | 0.75  | 1    | 19/79 |
| 2 | RPS2     | 2 | 1,3 | 1.53 | 0.03 | -0.86 | 1    | 73/79 |
| 2 | RPS15A   | 2 | 1,3 | 1.64 | 0.03 | 0.15  | 1    | 68/79 |
| 1 | RPL37A   | 1 | 1   | 1.52 | 0.03 | 0.45  | 1    | 34/79 |

|   |          |   |     |      |      |       |      |       |
|---|----------|---|-----|------|------|-------|------|-------|
| 2 | RPL23    | 2 | 1,2 | 1.64 | 0.03 | -0.19 | 1    | 68/79 |
| 1 | IGF2BP3  | 2 | 1,1 | 1.98 | 0.03 | -0.04 | 1    | 40/79 |
| 1 | TRA2B    | 2 | 1,1 | 1.88 | 0.03 | 0.56  | 1    | 42/79 |
| 2 | RPS7     | 2 | 1,2 | 1.92 | 0.03 | -0.07 | 1    | 58/79 |
| 1 | ATAD3A   | 1 | 1   | 1.74 | 0.03 | 0.63  | 1    | 26/79 |
| 2 | ATP5A1   | 2 | 1,2 | 2.06 | 0.03 | -0.16 | 1    | 54/79 |
| 1 | RBM3     | 2 | 1,1 | 1.76 | 0.03 | 0.07  | 1    | 45/79 |
| 1 | RBMXL2   | 2 | 1,1 | 1.52 | 0.03 | 0.11  | 1    | 52/79 |
| 1 | MCCC2    | 1 | 1   | 1.99 | 0.03 | 0.88  | 1    | 20/79 |
| 1 | ATP1A1   | 1 | 1   | 1.78 | 0.03 | 0.13  | 1    | 25/79 |
| 1 | NSUN2    | 1 | 1   | 1.99 | 0.03 | 1.06  | 1    | 20/79 |
| 1 | AIFM1    | 2 | 1,1 | 1.52 | 0.03 | -0.45 | 1    | 52/79 |
| 1 | NKRF     | 2 | 1,1 | 1.58 | 0.03 | -0.12 | 1    | 50/79 |
| 1 | EIF2AK2  | 1 | 1   | 2.04 | 0.03 | 1.31  | 1    | 19/79 |
| 1 | SEC24C   | 1 | 1   | 1.85 | 0.03 | 0.69  | 1    | 23/79 |
| 2 | RPS3A    | 2 | 1,2 | 1.77 | 0.03 | -0.29 | 1    | 63/79 |
| 2 | RPS6     | 2 | 1,3 | 1.84 | 0.03 | 0.03  | 1    | 61/79 |
| 1 | PHGDH    | 1 | 1   | 1.55 | 0.03 | 0.15  | 1    | 33/79 |
| 3 | SYNCRIP  | 1 | 3   | 1.88 | 0.03 | -0.17 | 1    | 67/79 |
| 2 | PCBP1    | 1 | 2   | 1.99 | 0.03 | 2     | 1    | 40/79 |
| 2 | KRT13    | 1 | 2   | 1.85 | 0.03 | 0.08  | 1.13 | 52/79 |
| 2 | RPS14    | 1 | 2   | 1.5  | 0.03 | -0.05 | 1    | 70/79 |
| 2 | TUBB1    | 1 | 2   | 1.5  | 0.03 | -0.57 | 1    | 70/79 |
| 2 | SNRPE    | 1 | 2   | 1.48 | 0.03 | -0.52 | 1    | 72/79 |
| 1 | BAG2     | 1 | 1   | 1.6  | 0.03 | 0.22  | 1    | 31/79 |
| 1 | PWP1     | 1 | 1   | 1.52 | 0.03 | 0.28  | 1    | 34/79 |
| 1 | KHDRBS1  | 1 | 1   | 1.57 | 0.03 | 0.55  | 1    | 32/79 |
| 1 | MSH6     | 1 | 1   | 2.04 | 0.03 | 0.54  | 1    | 19/79 |
| 1 | FLG2     | 1 | 1   | 1.71 | 0.03 | 0.36  | 1    | 27/79 |
| 1 | PDHB     | 1 | 1   | 1.89 | 0.03 | 1.02  | 1    | 22/79 |
| 1 | SSBP1    | 1 | 1   | 1.54 | 0.03 | 0.19  | 1.11 | 37/79 |
| 1 | PAIP2    | 1 | 1   | 1.81 | 0.03 | 1.05  | 1    | 24/79 |
| 1 | DDX6     | 1 | 1   | 1.74 | 0.03 | 0.03  | 1.41 | 37/79 |
| 1 | SF3B14   | 1 | 1   | 1.62 | 0.03 | 0.77  | 1    | 30/79 |
| 1 | SDHB     | 1 | 1   | 1.52 | 0.03 | 0.36  | 1    | 34/79 |
| 1 | HNRNPUL2 | 1 | 1   | 1.65 | 0.03 | 0.85  | 1    | 29/79 |
| 1 | RBM28    | 1 | 1   | 1.85 | 0.03 | 0.65  | 1    | 23/79 |
| 1 | IRS4     | 1 | 1   | 1.55 | 0.03 | -0.27 | 1.06 | 35/79 |
| 1 | TUBA4B   | 1 | 1   | 1.62 | 0.03 | 0.8   | 1    | 30/79 |
| 1 | POLR2A   | 1 | 1   | 1.62 | 0.03 | 0.17  | 1    | 30/79 |
| 2 | CSDA     | 2 | 2,1 | 1.46 | 0.02 | -0.95 | 1    | 77/79 |
| 2 | HNRNPAB  | 2 | 3,1 | 1.43 | 0.02 | -0.94 | 1    | 78/79 |
| 2 | RPS24    | 2 | 2,1 | 1.47 | 0.02 | -0.64 | 1    | 76/79 |

|   |           |   |     |      |      |       |      |       |
|---|-----------|---|-----|------|------|-------|------|-------|
| 2 | HNRNPA3   | 2 | 2,1 | 1.47 | 0.02 | -0.97 | 1    | 76/79 |
| 2 | RPL6      | 2 | 2,2 | 1.47 | 0.02 | -1.04 | 1    | 76/79 |
| 2 | HSPA7     | 2 | 2,1 | 1.46 | 0.02 | -1.27 | 1    | 77/79 |
| 1 | TAF15     | 1 | 1   | 1    | 0.02 | -1.69 | 1    | 79/79 |
| 2 | DDX5      | 2 | 1,2 | 1.41 | 0.02 | -1.46 | 1    | 79/79 |
| 1 | EEF1A1    | 2 | 1,1 | 1.11 | 0.02 | -0.75 | 1    | 71/79 |
| 1 | SEC23A    | 2 | 1,1 | 1.13 | 0.02 | -0.77 | 1    | 70/79 |
| 1 | YBX1      | 1 | 1   | 1.06 | 0.02 | -0.53 | 1    | 70/79 |
| 1 | SERBP1    | 1 | 1   | 1.37 | 0.02 | 0.13  | 1    | 42/79 |
| 1 | HNRNPL    | 2 | 1,1 | 1.2  | 0.02 | -0.69 | 1    | 66/79 |
| 1 | RPL13     | 2 | 1,1 | 1.23 | 0.02 | -0.58 | 1    | 64/79 |
| 1 | ACTBL2    | 2 | 1,1 | 1.22 | 0.02 | -0.29 | 1    | 65/79 |
| 1 | PRDX2     | 1 | 1   | 1.27 | 0.02 | -0.07 | 1    | 49/79 |
| 1 | ACTL6A    | 1 | 1   | 1.44 | 0.02 | 0.09  | 1    | 38/79 |
| 1 | C22orf28  | 1 | 1   | 1.02 | 0.02 | -1.2  | 1    | 75/79 |
| 1 | RPL11     | 2 | 1,1 | 1.01 | 0.02 | -0.82 | 1    | 78/79 |
| 1 | RPS3      | 2 | 1,1 | 1    | 0.02 | -1.43 | 1    | 79/79 |
| 1 | RPL31     | 1 | 1   | 1.05 | 0.02 | -0.7  | 1    | 71/79 |
| 1 | TRIM28    | 1 | 1   | 1.3  | 0.02 | -0.11 | 1    | 47/79 |
| 1 | NAP1L1    | 1 | 1   | 1.1  | 0.02 | -0.49 | 1    | 65/79 |
| 1 | HIST2H2BE | 2 | 1,1 | 1.18 | 0.02 | -0.63 | 1    | 67/79 |
| 1 | FUS       | 2 | 1,1 | 1    | 0.02 | -1.64 | 1    | 79/79 |
| 1 | CLTCL1    | 1 | 1   | 1.32 | 0.02 | -0.22 | 1.02 | 46/79 |
| 2 | HNRNPD    | 2 | 1,2 | 1.43 | 0.02 | -0.93 | 1    | 78/79 |
| 1 | DDX1      | 1 | 1   | 1.01 | 0.02 | -1.09 | 1    | 77/79 |
| 1 | RPL29P30  | 2 | 1,1 | 1.11 | 0.02 | -0.06 | 1    | 71/79 |
| 1 | DAP3      | 1 | 1   | 1.41 | 0.02 | 0.13  | 1    | 40/79 |
| 1 | RPL30     | 2 | 1,1 | 1.44 | 0.02 | -0.34 | 1    | 55/79 |
| 1 | HNRNPCL1  | 2 | 1,1 | 1.2  | 0.02 | -0.47 | 1    | 66/79 |
| 1 | THOC4     | 2 | 1,1 | 1.44 | 0.02 | -0.33 | 1    | 55/79 |
| 1 | RSL1D1    | 1 | 1   | 1.3  | 0.02 | -0.19 | 1    | 47/79 |
| 1 | DHX36     | 1 | 1   | 1.31 | 0.02 | -0.01 | 1    | 46/79 |
| 1 | RPS4X     | 2 | 1,1 | 1.05 | 0.02 | -1.08 | 1    | 75/79 |
| 1 | LOC646057 | 2 | 1,1 | 1.08 | 0.02 | -1.07 | 1    | 73/79 |
| 1 | SNRPA     | 2 | 1,1 | 1.3  | 0.02 | -0.52 | 1    | 61/79 |
| 1 | RPL18A    | 1 | 1   | 1.31 | 0.02 | -0.02 | 1    | 46/79 |
| 1 | RPLP1     | 2 | 1,1 | 1.03 | 0.02 | -0.97 | 1    | 77/79 |
| 1 | SNRPD2    | 1 | 1   | 1.1  | 0.02 | -0.66 | 1    | 65/79 |
| 1 | RPL22     | 1 | 1   | 1.11 | 0.02 | -0.28 | 1    | 64/79 |
| 1 | LUC7L2    | 1 | 1   | 1.41 | 0.02 | 0.14  | 1    | 40/79 |
| 1 | BAG4      | 2 | 1,1 | 1.1  | 0.02 | -1.03 | 1    | 72/79 |
| 1 | RPL23A    | 2 | 1,1 | 1.2  | 0.02 | -0.6  | 1    | 66/79 |
| 1 | KRT24     | 1 | 1   | 1.23 | 0.02 | 0     | 1    | 52/79 |



|   |           |   |     |      |      |       |      |       |
|---|-----------|---|-----|------|------|-------|------|-------|
| 2 | DDX17     | 2 | 1,3 | 1.43 | 0.02 | -1.1  | 1    | 78/79 |
| 1 | SNRPG     | 2 | 1,1 | 1.16 | 0.02 | -0.74 | 1    | 68/79 |
| 1 | MOV10     | 2 | 1,1 | 1.44 | 0.02 | -0.37 | 1    | 55/79 |
| 1 | SFRS7     | 1 | 1   | 1.11 | 0.02 | -0.58 | 1    | 64/79 |
| 1 | PRDX4     | 1 | 1   | 1.46 | 0.02 | 0.13  | 1    | 37/79 |
| 1 | RPS23     | 2 | 1,1 | 1.32 | 0.02 | -0.15 | 1    | 60/79 |
| 2 | SNRPD1    | 1 | 2   | 1.44 | 0.02 | -1.29 | 1    | 76/79 |
| 1 | RPSAP15   | 1 | 1   | 1.18 | 0.02 | -0.5  | 1    | 57/79 |
| 1 | RPS17     | 1 | 1   | 1.22 | 0.02 | -0.35 | 1    | 53/79 |
| 1 | RPL21P19  | 1 | 1   | 1.02 | 0.02 | -0.93 | 1    | 75/79 |
| 1 | RPSAP55   | 1 | 1   | 1.1  | 0.02 | -0.46 | 1    | 66/79 |
| 1 | HNRNPA0   | 1 | 1   | 1.12 | 0.02 | -0.39 | 1    | 63/79 |
| 1 | HNRPDL    | 1 | 1   | 1.02 | 0.02 | -1.24 | 1    | 75/79 |
| 1 | RPL24     | 1 | 1   | 1.08 | 0.02 | -0.73 | 1    | 68/79 |
| 1 | GAPDH     | 1 | 1   | 1.1  | 0.02 | -0.43 | 1    | 65/79 |
| 1 | LOC652595 | 1 | 1   | 1.2  | 0.02 | -0.31 | 1    | 55/79 |
| 1 | XRN2      | 1 | 1   | 1.1  | 0.02 | -0.71 | 1    | 65/79 |
| 1 | C14orf166 | 1 | 1   | 1.07 | 0.02 | -0.75 | 1    | 69/79 |
| 1 | MTHFD1    | 1 | 1   | 1.47 | 0.02 | -0.14 | 1.07 | 39/79 |
| 1 | RPS13     | 1 | 1   | 1.11 | 0.02 | -0.74 | 1    | 64/79 |
| 1 | HSP90AA2  | 1 | 1   | 1.17 | 0.02 | -0.29 | 1    | 58/79 |
| 1 | SNRPB     | 1 | 1   | 1.03 | 0.02 | -1    | 1    | 74/79 |
| 1 | RPL36AP37 | 1 | 1   | 1.05 | 0.02 | -0.91 | 1    | 71/79 |
| 1 | RPS25     | 1 | 1   | 1.1  | 0.02 | -0.67 | 1    | 65/79 |
| 1 | STRBP     | 1 | 1   | 1.27 | 0.02 | -0.08 | 1    | 49/79 |
| 1 | RPS16     | 1 | 1   | 1    | 0.02 | -0.86 | 1    | 78/79 |
| 1 | TXN       | 1 | 1   | 1.13 | 0.02 | -0.46 | 1    | 62/79 |
| 1 | HSPA4L    | 1 | 1   | 1.42 | 0.02 | -0.12 | 1    | 39/79 |

|    |           |   |       |       |      |       |      |       |
|----|-----------|---|-------|-------|------|-------|------|-------|
| 4  | RFC2      | 2 | 4,3   | 22.58 | 0.37 | 4.59  | 1    | 7/79  |
| 5  | KRT17     | 2 | 4,5   | 22.48 | 0.37 | 1.91  | 1.4  | 11/79 |
| 3  | SEC24B    | 2 | 3,2   | 22.75 | 0.37 | 0.65  | 2.16 | 13/79 |
| 1  | SLC25A11  | 2 | 1,1   | 19.75 | 0.32 | 4.32  | 1    | 4/79  |
| 1  | IARS      | 2 | 1,1   | 19.75 | 0.32 | 4.32  | 1    | 4/79  |
| 1  | HIST1H2BL | 2 | 1,1   | 19.75 | 0.32 | 3.24  | 1    | 4/79  |
| 2  | FLNA      | 2 | 2,1   | 18.74 | 0.31 | 0.03  | 2.18 | 13/79 |
| 2  | BUB3      | 2 | 1,2   | 18.63 | 0.31 | 2.39  | 1    | 6/79  |
| 2  | ANKRD28   | 2 | 1,2   | 18.63 | 0.31 | 2.59  | 1    | 6/79  |
| 2  | SERPINB4  | 2 | 2,1   | 18.3  | 0.3  | 1.2   | 1.31 | 8/79  |
| 1  | COPS4     | 2 | 1,1   | 17.98 | 0.3  | -0.13 | 1.82 | 8/79  |
| 2  | EFTUD2    | 2 | 2,1   | 16.9  | 0.28 | 0.14  | 2.57 | 17/79 |
| 6  | EIF4A1    | 2 | 7,4   | 16.05 | 0.26 | 0.73  | 2.57 | 31/79 |
| 2  | TGM3      | 2 | 2,2   | 15.97 | 0.26 | 2.64  | 1    | 7/79  |
| 2  | SNRNP200  | 2 | 1,3   | 15.5  | 0.26 | -0.02 | 3.74 | 27/79 |
| 1  | SMC3      | 2 | 1,1   | 15.69 | 0.26 | 0.02  | 2.58 | 13/79 |
| 1  | PSMA6     | 2 | 1,1   | 15.8  | 0.26 | 2.28  | 1    | 5/79  |
| 1  | KRT4      | 2 | 1,1   | 15.01 | 0.25 | 0.5   | 1.14 | 6/79  |
| 3  | NSMCE2    | 1 | 3     | 15.39 | 0.25 | 8.71  | 1    | 1/79  |
| 7  | SPTBN1    | 2 | 6,7   | 13.94 | 0.23 | 7.11  | 1    | 15/79 |
| 2  | SAPS3     | 2 | 2,2   | 13.97 | 0.23 | 1.04  | 1    | 8/79  |
| 9  | KRT16     | 2 | 11,7  | 13.36 | 0.22 | 0.77  | 1.97 | 35/79 |
| 2  | PSMC5     | 2 | 2,1   | 13.12 | 0.22 | -0.08 | 2.23 | 19/79 |
| 1  | KEAP1     | 2 | 1,1   | 13.54 | 0.22 | -0.08 | 1.37 | 8/79  |
| 1  | PIP       | 2 | 1,1   | 13.17 | 0.22 | 2.2   | 1    | 6/79  |
| 2  | RPAP3     | 1 | 2     | 12.57 | 0.21 | 8.57  | 1    | 1/79  |
| 1  | USP7      | 2 | 1,1   | 12.65 | 0.21 | -0.07 | 2.72 | 17/79 |
| 2  | NSMCE1    | 1 | 2     | 12.57 | 0.21 | 8.57  | 1    | 1/79  |
| 2  | TCF25     | 1 | 2     | 12.57 | 0.21 | 8.57  | 1    | 1/79  |
| 1  | TP53      | 2 | 1,1   | 11.29 | 0.19 | 1.89  | 1    | 7/79  |
| 11 | AHCY      | 2 | 10,11 | 10.64 | 0.18 | 2.33  | 1.91 | 47/79 |
| 5  | DSP       | 2 | 5,4   | 10.83 | 0.18 | 0.29  | 1.9  | 31/79 |
| 3  | KRT6B     | 2 | 3,3   | 11.02 | 0.18 | 0.75  | 1.53 | 19/79 |
| 2  | RFC5      | 2 | 2,1   | 11.17 | 0.18 | 3.64  | 1    | 10/79 |
| 2  | DSG1      | 2 | 1,3   | 11.17 | 0.18 | 0.75  | 1.2  | 12/79 |
| 3  | JUP       | 2 | 3,2   | 10.35 | 0.17 | 1.17  | 1.21 | 16/79 |
| 3  | PRPH      | 2 | 2,3   | 10.53 | 0.17 | 4.6   | 1    | 13/79 |
| 3  | DCD       | 2 | 1,5   | 10.53 | 0.17 | 4.45  | 1    | 13/79 |
| 4  | SEC31A    | 2 | 5,3   | 9.88  | 0.16 | 4.83  | 1    | 16/79 |
| 4  | XRCC6     | 2 | 4,4   | 9.88  | 0.16 | 3.06  | 1    | 16/79 |
| 2  | CUL3      | 2 | 2,1   | 9.76  | 0.16 | -0.01 | 2.27 | 26/79 |
| 2  | ATAD3B    | 2 | 2,1   | 9.81  | 0.16 | 0.62  | 1.23 | 14/79 |
| 1  | PFDN2     | 2 | 1,1   | 9.88  | 0.16 | 2.47  | 1    | 8/79  |

|    |              |   |       |      |      |      |      |       |
|----|--------------|---|-------|------|------|------|------|-------|
| 11 | AGL          | 2 | 11,11 | 9.03 | 0.15 | 2.2  | 1.48 | 43/79 |
| 2  | CNOT1        | 1 | 2     | 8.89 | 0.15 | 3.84 | 1    | 2/79  |
| 2  | RFC3         | 1 | 2     | 8.89 | 0.15 | 7.84 | 1    | 2/79  |
| 2  | CAPZB        | 1 | 2     | 8.89 | 0.15 | 7.84 | 1    | 2/79  |
| 1  | NP           | 1 | 1     | 8.89 | 0.15 | 9    | 1    | 1/79  |
| 1  | HBS1L        | 1 | 1     | 8.89 | 0.15 | 9    | 1    | 1/79  |
| 1  | ZNF596       | 1 | 1     | 8.89 | 0.15 | 9    | 1    | 1/79  |
| 1  | C21orf45     | 1 | 1     | 8.89 | 0.15 | 9    | 1    | 1/79  |
| 1  | MCF2L        | 1 | 1     | 8.89 | 0.15 | 9    | 1    | 1/79  |
| 1  | AKAP9        | 1 | 1     | 8.89 | 0.15 | 9    | 1    | 1/79  |
| 1  | IRF4         | 1 | 1     | 8.89 | 0.15 | 9    | 1    | 1/79  |
| 1  | COL1A1       | 1 | 1     | 8.89 | 0.15 | 9    | 1    | 1/79  |
| 1  | GPR50        | 1 | 1     | 8.89 | 0.15 | 9    | 1    | 1/79  |
| 1  | IGHA1        | 1 | 1     | 8.89 | 0.15 | 9    | 1    | 1/79  |
| 1  | PRSS3        | 1 | 1     | 8.89 | 0.15 | 9    | 1    | 1/79  |
| 1  | NDRG1        | 1 | 1     | 8.89 | 0.15 | 9    | 1    | 1/79  |
| 1  | S100A14      | 1 | 1     | 8.89 | 0.15 | 9    | 1    | 1/79  |
| 1  | WDR92        | 1 | 1     | 8.89 | 0.15 | 9    | 1    | 1/79  |
| 1  | GTPBP6       | 1 | 1     | 8.89 | 0.15 | 9    | 1    | 1/79  |
| 1  | KIAA1128     | 1 | 1     | 8.89 | 0.15 | 9    | 1    | 1/79  |
| 1  | ZBTB33       | 1 | 1     | 8.89 | 0.15 | 9    | 1    | 1/79  |
| 1  | BIRC6        | 1 | 1     | 8.89 | 0.15 | 9    | 1    | 1/79  |
| 1  | LONP1        | 1 | 1     | 8.89 | 0.15 | 9    | 1    | 1/79  |
| 1  | DEK          | 1 | 1     | 8.89 | 0.15 | 9    | 1    | 1/79  |
| 1  | MTMR3        | 1 | 1     | 8.89 | 0.15 | 9    | 1    | 1/79  |
| 1  | NUFIP2       | 1 | 1     | 8.89 | 0.15 | 9    | 1    | 1/79  |
| 1  | MRPL22       | 1 | 1     | 8.89 | 0.15 | 9    | 1    | 1/79  |
| 1  | PIP5K1A      | 1 | 1     | 8.89 | 0.15 | 9    | 1    | 1/79  |
| 1  | MPHOSPH6     | 1 | 1     | 8.89 | 0.15 | 9    | 1    | 1/79  |
| 1  | LOC100134794 | 1 | 1     | 8.89 | 0.15 | 9    | 1    | 1/79  |
| 1  | TXNDC12      | 1 | 1     | 8.89 | 0.15 | 9    | 1    | 1/79  |
| 1  | FUBP3        | 1 | 1     | 8.89 | 0.15 | 9    | 1    | 1/79  |
| 1  | BRD3         | 1 | 1     | 8.89 | 0.15 | 9    | 1    | 1/79  |
| 2  | SERPINB3     | 1 | 2     | 8.89 | 0.15 | 6.09 | 1    | 2/79  |
| 1  | EXOSC8       | 1 | 1     | 8.89 | 0.15 | 9    | 1    | 1/79  |
| 1  | MAP1B        | 1 | 1     | 8.89 | 0.15 | 9    | 1    | 1/79  |
| 1  | MED1         | 1 | 1     | 8.89 | 0.15 | 9    | 1    | 1/79  |
| 1  | NFATC1       | 1 | 1     | 8.89 | 0.15 | 9    | 1    | 1/79  |
| 1  | RDH11        | 1 | 1     | 8.89 | 0.15 | 9    | 1    | 1/79  |
| 1  | RIOK2        | 1 | 1     | 8.89 | 0.15 | 9    | 1    | 1/79  |
| 1  | NUMA1        | 1 | 1     | 8.89 | 0.15 | 9    | 1    | 1/79  |
| 1  | C1orf35      | 1 | 1     | 8.89 | 0.15 | 9    | 1    | 1/79  |
| 1  | C1orf107     | 1 | 1     | 8.89 | 0.15 | 9    | 1    | 1/79  |

|    |          |   |       |      |      |      |      |       |
|----|----------|---|-------|------|------|------|------|-------|
| 1  | KIF13B   | 1 | 1     | 8.89 | 0.15 | 9    | 1    | 1/79  |
| 1  | THOC6    | 1 | 1     | 8.89 | 0.15 | 9    | 1    | 1/79  |
| 1  | CDK5RAP2 | 1 | 1     | 8.89 | 0.15 | 9    | 1    | 1/79  |
| 1  | GAPVD1   | 1 | 1     | 8.89 | 0.15 | 9    | 1    | 1/79  |
| 1  | SERPINA4 | 1 | 1     | 8.89 | 0.15 | 9    | 1    | 1/79  |
| 1  | MID1IP1  | 1 | 1     | 8.89 | 0.15 | 9    | 1    | 1/79  |
| 2  | ACP1     | 1 | 2     | 8.89 | 0.15 | 7.84 | 1    | 2/79  |
| 1  | MTA1     | 1 | 1     | 8.89 | 0.15 | 9    | 1    | 1/79  |
| 1  | ALDH7A1  | 1 | 1     | 8.89 | 0.15 | 9    | 1    | 1/79  |
| 1  | NUDT19   | 1 | 1     | 8.89 | 0.15 | 9    | 1    | 1/79  |
| 1  | PAPSS1   | 1 | 1     | 8.89 | 0.15 | 9    | 1    | 1/79  |
| 1  | TRIM65   | 1 | 1     | 8.89 | 0.15 | 9    | 1    | 1/79  |
| 1  | TAF2     | 1 | 1     | 8.89 | 0.15 | 9    | 1    | 1/79  |
| 1  | SERPINB6 | 1 | 1     | 8.89 | 0.15 | 9    | 1    | 1/79  |
| 2  | S100A9   | 2 | 2,2   | 8.6  | 0.14 | 1.82 | 1    | 13/79 |
| 3  | CDC5L    | 2 | 2,3   | 8.57 | 0.14 | 1.65 | 1.19 | 19/79 |
| 2  | KRT3     | 2 | 2,1   | 8.6  | 0.14 | 2.95 | 1    | 13/79 |
| 2  | COPS5    | 1 | 2     | 8.69 | 0.14 | 0.04 | 1.91 | 4/79  |
| 5  | KLHL12   | 2 | 6,4   | 8.03 | 0.13 | 3.23 | 1    | 22/79 |
| 5  | EIF4A3   | 2 | 3,6   | 8.03 | 0.13 | 5.45 | 1    | 22/79 |
| 3  | SEC23B   | 2 | 1,4   | 8.14 | 0.13 | 2.06 | 1.19 | 20/79 |
| 4  | CCT2     | 2 | 5,2   | 7.03 | 0.12 | 0.08 | 1.87 | 42/79 |
| 2  | SNW1     | 1 | 2     | 7.26 | 0.12 | 7.22 | 1    | 3/79  |
| 1  | SIRT1    | 1 | 1     | 7.19 | 0.12 | 0.24 | 1.31 | 2/79  |
| 2  | TRA2A    | 2 | 1,2   | 6.99 | 0.12 | 3.69 | 1    | 16/79 |
| 1  | ANKFY1   | 1 | 1     | 7.22 | 0.12 | 0.2  | 1.32 | 2/79  |
| 1  | SART1    | 1 | 1     | 7.08 | 0.12 | 0.35 | 1.27 | 2/79  |
| 2  | GYS1     | 1 | 2     | 7.26 | 0.12 | 5.88 | 1    | 3/79  |
| 2  | PDIA3    | 1 | 2     | 7.26 | 0.12 | 7.22 | 1    | 3/79  |
| 42 | KRT1     | 2 | 39,45 | 6.48 | 0.11 | 0.38 | 1    | 79/79 |
| 7  | KRT14    | 2 | 7,7   | 6.69 | 0.11 | 0.87 | 1.47 | 46/79 |
| 2  | HUWE1    | 2 | 1,2   | 6.65 | 0.11 | 0.19 | 1.13 | 19/79 |
| 27 | KRT9     | 2 | 27,26 | 6.06 | 0.1  | 0.87 | 1.08 | 73/79 |
| 2  | HSD17B10 | 2 | 2,1   | 6.03 | 0.1  | 1.17 | 1.35 | 25/79 |
| 2  | RFC4     | 1 | 2     | 6.28 | 0.1  | 4.78 | 1    | 4/79  |
| 3  | XRCC5    | 2 | 2,3   | 6.22 | 0.1  | 2.35 | 1    | 22/79 |
| 2  | COPS8    | 1 | 2     | 6.03 | 0.1  | 0.5  | 1.15 | 5/79  |
| 1  | CLTA     | 1 | 1     | 6.28 | 0.1  | 6.06 | 1    | 2/79  |
| 1  | KIAA1529 | 1 | 1     | 6.28 | 0.1  | 6.06 | 1    | 2/79  |
| 1  | GNL3L    | 1 | 1     | 6.28 | 0.1  | 3.84 | 1    | 2/79  |
| 2  | ENO1     | 2 | 1,3   | 5.88 | 0.1  | 1.94 | 1    | 19/79 |
| 1  | WDR82    | 1 | 1     | 6.28 | 0.1  | 6.06 | 1    | 2/79  |
| 1  | AHCYL1   | 1 | 1     | 6.16 | 0.1  | 0.43 | 1.44 | 3/79  |

|    |          |   |       |      |      |       |      |       |
|----|----------|---|-------|------|------|-------|------|-------|
| 1  | PLK1     | 1 | 1     | 6.28 | 0.1  | 2.71  | 1    | 2/79  |
| 1  | ANKHD1   | 1 | 1     | 6.14 | 0.1  | 0.46  | 1.43 | 3/79  |
| 1  | USP11    | 2 | 1,1   | 6.12 | 0.1  | -0.19 | 1.47 | 19/79 |
| 1  | POLD2    | 1 | 1     | 6.28 | 0.1  | 6.06  | 1    | 2/79  |
| 1  | PAPD5    | 1 | 1     | 6.28 | 0.1  | 6.06  | 1    | 2/79  |
| 1  | NCCRP1   | 1 | 1     | 6.28 | 0.1  | 6.06  | 1    | 2/79  |
| 1  | DCTN2    | 1 | 1     | 6.28 | 0.1  | 6.06  | 1    | 2/79  |
| 1  | TRAPPC2L | 1 | 1     | 6.28 | 0.1  | 6.06  | 1    | 2/79  |
| 1  | AQR      | 1 | 1     | 6.28 | 0.1  | 6.06  | 1    | 2/79  |
| 1  | GPHN     | 1 | 1     | 6.28 | 0.1  | 6.06  | 1    | 2/79  |
| 1  | MAP2K3   | 1 | 1     | 6.28 | 0.1  | 6.06  | 1    | 2/79  |
| 1  | PSMB1    | 1 | 1     | 6.28 | 0.1  | 6.06  | 1    | 2/79  |
| 1  | MYL9     | 1 | 1     | 6.28 | 0.1  | 6.06  | 1    | 2/79  |
| 1  | HIF1AN   | 1 | 1     | 6.28 | 0.1  | 6.06  | 1    | 2/79  |
| 1  | EMD      | 1 | 1     | 6.28 | 0.1  | 6.06  | 1    | 2/79  |
| 1  | PPIL4    | 1 | 1     | 6.28 | 0.1  | 6.06  | 1    | 2/79  |
| 1  | KCNQ5    | 1 | 1     | 6.28 | 0.1  | 6.06  | 1    | 2/79  |
| 1  | IGLC1    | 1 | 1     | 6.28 | 0.1  | 6.06  | 1    | 2/79  |
| 1  | FAM122B  | 1 | 1     | 6.28 | 0.1  | 6.06  | 1    | 2/79  |
| 1  | NAMPT    | 1 | 1     | 6.28 | 0.1  | 6.06  | 1    | 2/79  |
| 1  | LARS     | 1 | 1     | 6.28 | 0.1  | 6.06  | 1    | 2/79  |
| 1  | PSIP1    | 1 | 1     | 6.28 | 0.1  | 6.06  | 1    | 2/79  |
| 1  | SAFB2    | 1 | 1     | 6.28 | 0.1  | 6.06  | 1    | 2/79  |
| 1  | S100A8   | 1 | 1     | 6.28 | 0.1  | 2.71  | 1    | 2/79  |
| 1  | DSTN     | 1 | 1     | 6.28 | 0.1  | 6.06  | 1    | 2/79  |
| 1  | SAFB     | 1 | 1     | 6.28 | 0.1  | 6.06  | 1    | 2/79  |
| 1  | MYL12B   | 1 | 1     | 6.28 | 0.1  | 3.84  | 1    | 2/79  |
| 1  | EEF1E1   | 1 | 1     | 6.28 | 0.1  | 6.06  | 1    | 2/79  |
| 27 | KRT10    | 2 | 28,25 | 5.2  | 0.09 | 0     | 1    | 79/79 |
| 27 | HSPA8    | 2 | 21,32 | 5.2  | 0.09 | -1.04 | 1    | 79/79 |
| 31 | TFG      | 2 | 26,36 | 5.57 | 0.09 | -0.38 | 1    | 79/79 |
| 7  | SRRM2    | 1 | 7     | 5.71 | 0.09 | 4.87  | 1    | 17/79 |
| 5  | SPTAN1   | 2 | 5,5   | 5.34 | 0.09 | 5.59  | 1    | 33/79 |
| 2  | ANKRD52  | 1 | 2     | 5.62 | 0.09 | 4.63  | 1    | 5/79  |
| 3  | KRT71    | 2 | 2,4   | 5.27 | 0.09 | 3.1   | 1    | 26/79 |
| 2  | MCCC2    | 2 | 2,1   | 5.59 | 0.09 | 2.14  | 1    | 20/79 |
| 2  | CCT3     | 2 | 1,2   | 5.58 | 0.09 | 0.09  | 1.5  | 30/79 |
| 1  | MAT2A    | 2 | 1,1   | 5.64 | 0.09 | 1.45  | 1    | 14/79 |
| 1  | EXOSC10  | 2 | 1,1   | 5.27 | 0.09 | 0.79  | 1    | 15/79 |
| 1  | PRPF4B   | 1 | 1     | 5.39 | 0.09 | 0.6   | 1.47 | 4/79  |
| 21 | TUBB2C   | 2 | 16,26 | 4.58 | 0.08 | -0.09 | 1    | 79/79 |
| 10 | KRT5     | 2 | 9,10  | 5.12 | 0.08 | 0.76  | 1.11 | 54/79 |
| 6  | CLTC     | 2 | 5,7   | 4.61 | 0.08 | 0.3   | 1.57 | 66/79 |

|    |           |   |       |      |      |       |      |       |
|----|-----------|---|-------|------|------|-------|------|-------|
| 3  | DARS      | 1 | 3     | 4.87 | 0.08 | 5.8   | 1    | 10/79 |
| 2  | PSMD13    | 1 | 2     | 4.85 | 0.08 | -0.1  | 1.49 | 10/79 |
| 2  | LYZ       | 1 | 2     | 5.13 | 0.08 | 4.5   | 1    | 6/79  |
| 1  | MTAP      | 1 | 1     | 5.13 | 0.08 | 5.05  | 1    | 3/79  |
| 1  | MRPS21    | 1 | 1     | 5.13 | 0.08 | 3.52  | 1    | 3/79  |
| 1  | SERPINB12 | 2 | 1,1   | 4.94 | 0.08 | 1.31  | 1    | 16/79 |
| 1  | CDKN2A    | 2 | 1,1   | 4.65 | 0.08 | 0.81  | 1    | 17/79 |
| 1  | PKP1      | 1 | 1     | 5.13 | 0.08 | 5.05  | 1    | 3/79  |
| 1  | BLMH      | 1 | 1     | 5.13 | 0.08 | 1.78  | 1    | 3/79  |
| 1  | SNRPA1    | 1 | 1     | 5.13 | 0.08 | 5.05  | 1    | 3/79  |
| 1  | ACBD3     | 1 | 1     | 5.13 | 0.08 | 5.05  | 1    | 3/79  |
| 1  | BAT2D1    | 1 | 1     | 5.13 | 0.08 | 5.05  | 1    | 3/79  |
| 1  | MACF1     | 1 | 1     | 5.13 | 0.08 | 5.05  | 1    | 3/79  |
| 1  | PMPCB     | 1 | 1     | 5.13 | 0.08 | 5.05  | 1    | 3/79  |
| 1  | SUGT1     | 1 | 1     | 5.13 | 0.08 | 5.05  | 1    | 3/79  |
| 1  | GMPS      | 1 | 1     | 4.79 | 0.08 | 0.25  | 1.74 | 6/79  |
| 1  | ARG1      | 1 | 1     | 5.13 | 0.08 | 1.96  | 1    | 3/79  |
| 1  | GIGYF2    | 1 | 1     | 5.13 | 0.08 | 1.78  | 1    | 3/79  |
| 1  | ACOT7     | 1 | 1     | 5.13 | 0.08 | 5.05  | 1    | 3/79  |
| 1  | CSNK2A2   | 1 | 1     | 4.96 | 0.08 | 0.12  | 1.56 | 5/79  |
| 1  | ASL       | 1 | 1     | 5.13 | 0.08 | 5.05  | 1    | 3/79  |
| 1  | DRG1      | 1 | 1     | 5.13 | 0.08 | 5.05  | 1    | 3/79  |
| 1  | GNL2      | 1 | 1     | 5.13 | 0.08 | 5.05  | 1    | 3/79  |
| 1  | GPRASP2   | 1 | 1     | 5.13 | 0.08 | 5.05  | 1    | 3/79  |
| 2  | PSMA7     | 1 | 2     | 5.13 | 0.08 | 5.79  | 1    | 6/79  |
| 1  | NUP133    | 1 | 1     | 5.13 | 0.08 | 5.05  | 1    | 3/79  |
| 1  | CTTN      | 1 | 1     | 5.13 | 0.08 | 5.05  | 1    | 3/79  |
| 1  | PSMB5     | 1 | 1     | 5.13 | 0.08 | 3.52  | 1    | 3/79  |
| 1  | UCHL5     | 1 | 1     | 4.72 | 0.08 | 0.55  | 1.13 | 4/79  |
| 1  | AZGP1     | 1 | 1     | 5.13 | 0.08 | 2.54  | 1    | 3/79  |
| 1  | PDE12     | 1 | 1     | 5.13 | 0.08 | 5.05  | 1    | 3/79  |
| 1  | PDXK      | 1 | 1     | 5.13 | 0.08 | 5.05  | 1    | 3/79  |
| 1  | SHMT2     | 1 | 1     | 4.72 | 0.08 | -0.06 | 2.82 | 10/79 |
| 1  | GMPPB     | 1 | 1     | 5.13 | 0.08 | 5.05  | 1    | 3/79  |
| 1  | PYCRL     | 1 | 1     | 5.13 | 0.08 | 3.52  | 1    | 3/79  |
| 17 | KRT2      | 2 | 18,15 | 4.16 | 0.07 | 0     | 1    | 78/79 |
| 11 | CAD       | 2 | 13,8  | 4.08 | 0.07 | 0.08  | 1    | 64/79 |
| 16 | HSPA1A    | 2 | 11,21 | 4    | 0.07 | -0.95 | 1    | 79/79 |
| 7  | VIM       | 2 | 7,6   | 4.37 | 0.07 | 1.38  | 1    | 48/79 |
| 5  | PKM2      | 2 | 5,5   | 4.54 | 0.07 | 0.43  | 1.41 | 55/79 |
| 3  | PHGDH     | 2 | 3,3   | 4.14 | 0.07 | 1.79  | 1    | 33/79 |
| 2  | TCP1      | 2 | 2,2   | 4.53 | 0.07 | -0.09 | 1.38 | 34/79 |
| 2  | RPA1      | 1 | 2     | 4.45 | 0.07 | 5.25  | 1    | 8/79  |

|    |          |   |       |      |      |       |      |       |
|----|----------|---|-------|------|------|-------|------|-------|
| 2  | ZC3HAV1  | 1 | 2     | 4.45 | 0.07 | 3.63  | 1    | 8/79  |
| 2  | LGALS7   | 1 | 2     | 4.19 | 0.07 | 2.01  | 1    | 9/79  |
| 2  | FLG2     | 2 | 2,1   | 4.14 | 0.07 | 1.19  | 1    | 27/79 |
| 3  | RUVBL1   | 2 | 2,3   | 4.02 | 0.07 | 0.86  | 1    | 34/79 |
| 1  | ALDOA    | 1 | 1     | 4.44 | 0.07 | 4.32  | 1    | 4/79  |
| 1  | EXOSC2   | 2 | 1,1   | 4.39 | 0.07 | 1.44  | 1    | 18/79 |
| 1  | RNF219   | 1 | 1     | 3.97 | 0.07 | 3.76  | 1    | 5/79  |
| 1  | CBR3     | 1 | 1     | 4.44 | 0.07 | 4.32  | 1    | 4/79  |
| 1  | CHD4     | 1 | 1     | 4.44 | 0.07 | 4.32  | 1    | 4/79  |
| 1  | IPO5     | 1 | 1     | 4.44 | 0.07 | 2.42  | 1    | 4/79  |
| 1  | DNAJC7   | 2 | 1,1   | 4.39 | 0.07 | 0.38  | 1    | 18/79 |
| 1  | CMBL     | 1 | 1     | 4.44 | 0.07 | 2.63  | 1    | 4/79  |
| 1  | USP15    | 2 | 1,1   | 4.13 | 0.07 | -0.11 | 1.57 | 30/79 |
| 1  | POLR1C   | 1 | 1     | 3.97 | 0.07 | 1.1   | 1    | 5/79  |
| 1  | DOCK7    | 1 | 1     | 4.44 | 0.07 | 3.24  | 1    | 4/79  |
| 2  | MCM7     | 2 | 1,2   | 3.99 | 0.07 | 0.75  | 1    | 28/79 |
| 1  | KIF5B    | 1 | 1     | 4.53 | 0.07 | 0.92  | 1.3  | 5/79  |
| 2  | RNPS1    | 1 | 2     | 3.97 | 0.07 | 4.89  | 1    | 10/79 |
| 1  | BXDC1    | 1 | 1     | 4.44 | 0.07 | 4.32  | 1    | 4/79  |
| 1  | PYGL     | 1 | 1     | 4.44 | 0.07 | 4.32  | 1    | 4/79  |
| 1  | EIF3F    | 1 | 1     | 4.04 | 0.07 | 0.06  | 2.48 | 12/79 |
| 1  | SF3A1    | 1 | 1     | 3.97 | 0.07 | 3.76  | 1    | 5/79  |
| 1  | HSPC152  | 1 | 1     | 3.97 | 0.07 | 3.76  | 1    | 5/79  |
| 1  | PSMD14   | 1 | 1     | 4.1  | 0.07 | -0.09 | 1.49 | 7/79  |
| 1  | CRKL     | 1 | 1     | 4.44 | 0.07 | 3.24  | 1    | 4/79  |
| 1  | TGM1     | 1 | 1     | 4.44 | 0.07 | 2.42  | 1    | 4/79  |
| 12 | HNRNPM   | 2 | 14,9  | 3.95 | 0.06 | 1.3   | 1    | 69/79 |
| 13 | NCL      | 2 | 12,13 | 3.71 | 0.06 | -0.78 | 1    | 77/79 |
| 6  | HSPD1    | 2 | 6,6   | 3.45 | 0.06 | 0.54  | 1    | 56/79 |
| 3  | MTHFD1   | 2 | 4,1   | 3.66 | 0.06 | 0.66  | 1.04 | 39/79 |
| 3  | EEF1G    | 2 | 3,2   | 3.71 | 0.06 | 2.71  | 1    | 37/79 |
| 2  | HIST1H4J | 2 | 3,1   | 3.49 | 0.06 | 1.6   | 1    | 32/79 |
| 2  | YWHAE    | 1 | 2     | 3.67 | 0.06 | -0.08 | 2.73 | 32/79 |
| 2  | CAPRIN1  | 1 | 2     | 3.41 | 0.06 | 0     | 3.1  | 42/79 |
| 3  | ZNF326   | 1 | 3     | 3.73 | 0.06 | 4.79  | 1    | 17/79 |
| 2  | QARS     | 1 | 2     | 3.63 | 0.06 | 3.33  | 1    | 12/79 |
| 4  | RUVBL2   | 2 | 2,5   | 3.76 | 0.06 | 0.77  | 1    | 42/79 |
| 1  | HDAC2    | 1 | 1     | 3.63 | 0.06 | 2.76  | 1    | 6/79  |
| 1  | C8orf33  | 1 | 1     | 3.36 | 0.06 | 2.02  | 1    | 7/79  |
| 1  | PELO     | 1 | 1     | 3.36 | 0.06 | 2.65  | 1    | 7/79  |
| 1  | ALB      | 1 | 1     | 3.36 | 0.06 | 1.72  | 1    | 7/79  |
| 1  | ANXA2    | 1 | 1     | 3.36 | 0.06 | 2.12  | 1    | 7/79  |
| 1  | MCM4     | 1 | 1     | 3.91 | 0.06 | 0.41  | 1.74 | 9/79  |

|    |              |   |      |      |      |       |      |       |
|----|--------------|---|------|------|------|-------|------|-------|
| 1  | CSNK2A1      | 1 | 1    | 3.91 | 0.06 | 0.06  | 1.94 | 10/79 |
| 1  | CKB          | 1 | 1    | 3.36 | 0.06 | 1.56  | 1    | 7/79  |
| 1  | PGAM5        | 1 | 1    | 3.74 | 0.06 | 0.13  | 1.95 | 11/79 |
| 1  | EIF3L        | 1 | 1    | 3.82 | 0.06 | -0.12 | 2.22 | 12/79 |
| 1  | WDR61        | 1 | 1    | 3.63 | 0.06 | 2.76  | 1    | 6/79  |
| 1  | WDR48        | 1 | 1    | 3.64 | 0.06 | -0.13 | 1.85 | 11/79 |
| 1  | EIF5A        | 1 | 1    | 3.36 | 0.06 | 2.65  | 1    | 7/79  |
| 1  | USP13        | 1 | 1    | 3.39 | 0.06 | 0.43  | 1.02 | 7/79  |
| 1  | POLR2H       | 1 | 1    | 3.63 | 0.06 | 3.41  | 1    | 6/79  |
| 1  | CBX1         | 1 | 1    | 3.63 | 0.06 | 1.98  | 1    | 6/79  |
| 1  | PRPF8        | 1 | 1    | 3.4  | 0.06 | -0.08 | 4.09 | 28/79 |
| 1  | EIF3E        | 1 | 1    | 3.75 | 0.06 | -0.12 | 1.96 | 11/79 |
| 1  | NUP155       | 1 | 1    | 3.63 | 0.06 | 3.41  | 1    | 6/79  |
| 1  | EIF3CL;EIF3C | 1 | 1    | 3.51 | 0.06 | -0.13 | 2.34 | 15/79 |
| 1  | DNAJB6       | 1 | 1    | 3.63 | 0.06 | 3.41  | 1    | 6/79  |
| 1  | RAE1         | 1 | 1    | 3.42 | 0.06 | 0.64  | 1.33 | 9/79  |
| 8  | DHX9         | 2 | 11,4 | 2.86 | 0.05 | -0.94 | 1    | 78/79 |
| 8  | HNRNPUL1     | 2 | 9,7  | 2.83 | 0.05 | -1.15 | 1    | 79/79 |
| 7  | DDX21        | 2 | 8,5  | 2.94 | 0.05 | 0.04  | 1    | 71/79 |
| 8  | PABPC1       | 2 | 10,6 | 2.86 | 0.05 | -0.88 | 1    | 78/79 |
| 10 | HSPA5        | 2 | 7,13 | 3.16 | 0.05 | -1.04 | 1    | 79/79 |
| 9  | HSPA1L       | 2 | 9,8  | 3    | 0.05 | -0.81 | 1    | 79/79 |
| 7  | PRDX1        | 2 | 6,7  | 2.78 | 0.05 | 0.97  | 1    | 75/79 |
| 8  | RPL7A        | 2 | 7,9  | 3.03 | 0.05 | 1.34  | 1    | 74/79 |
| 7  | EEF2         | 2 | 5,8  | 2.94 | 0.05 | 0.79  | 1    | 71/79 |
| 5  | PDIA6        | 2 | 5,4  | 3.26 | 0.05 | 3.12  | 1    | 54/79 |
| 6  | IGF2BP1      | 2 | 4,7  | 2.79 | 0.05 | 0.54  | 1    | 69/79 |
| 3  | KRT13        | 2 | 4,1  | 2.95 | 0.05 | 0.44  | 1.12 | 52/79 |
| 3  | TUFM         | 2 | 4,1  | 2.74 | 0.05 | 0.74  | 1    | 50/79 |
| 4  | HSP90AA1     | 2 | 3,4  | 2.74 | 0.05 | 0.2   | 1.18 | 68/79 |
| 4  | HSPH1        | 2 | 3,4  | 2.92 | 0.05 | 0.27  | 1    | 54/79 |
| 3  | PPP2CA       | 1 | 3    | 2.81 | 0.05 | 1.82  | 1    | 30/79 |
| 3  | FXR1         | 1 | 3    | 3.28 | 0.05 | 2.45  | 1    | 22/79 |
| 1  | PPM1G        | 1 | 1    | 2.96 | 0.05 | 0.78  | 1    | 9/79  |
| 1  | YWHAQ        | 2 | 1,1  | 3.34 | 0.05 | 0     | 1.31 | 31/79 |
| 1  | HRNR         | 1 | 1    | 3.14 | 0.05 | 1.77  | 1    | 8/79  |
| 1  | PAICS        | 1 | 1    | 2.81 | 0.05 | 1.16  | 1    | 10/79 |
| 1  | YTHDF2       | 1 | 1    | 2.96 | 0.05 | 2.35  | 1    | 9/79  |
| 1  | C1orf77      | 1 | 1    | 3.14 | 0.05 | 3     | 1    | 8/79  |
| 1  | PSMD2        | 1 | 1    | 3.25 | 0.05 | -0.15 | 2.14 | 16/79 |
| 1  | PSMC4        | 1 | 1    | 3.14 | 0.05 | -0.11 | 2.12 | 17/79 |
| 1  | KPNA4        | 1 | 1    | 2.81 | 0.05 | 1.55  | 1    | 10/79 |
| 2  | PCBP1        | 2 | 1,2  | 2.8  | 0.05 | 2     | 1    | 40/79 |



|   |           |   |     |      |      |       |      |       |
|---|-----------|---|-----|------|------|-------|------|-------|
| 1 | EIF2S3    | 1 | 1   | 2.81 | 0.05 | 1.98  | 1    | 10/79 |
| 1 | MRPS26    | 1 | 1   | 2.96 | 0.05 | 1.5   | 1    | 9/79  |
| 1 | SF3B2     | 1 | 1   | 2.96 | 0.05 | 2.78  | 1    | 9/79  |
| 1 | PLEC1     | 1 | 1   | 3.14 | 0.05 | 2.18  | 1    | 8/79  |
| 1 | PSMC3     | 1 | 1   | 2.91 | 0.05 | -0.15 | 2.15 | 20/79 |
| 1 | ATP2A2    | 1 | 1   | 3.14 | 0.05 | 2.47  | 1    | 8/79  |
| 1 | P4HB      | 1 | 1   | 3.14 | 0.05 | 3     | 1    | 8/79  |
| 1 | ATP5B     | 2 | 1,1 | 3.04 | 0.05 | 0.28  | 1    | 26/79 |
| 1 | PRKDC     | 2 | 1,1 | 3.16 | 0.05 | -0.14 | 1    | 25/79 |
| 2 | PRDX4     | 2 | 1,2 | 3.03 | 0.05 | 0.97  | 1    | 37/79 |
| 1 | LRPPRC    | 1 | 1   | 3.14 | 0.05 | 2.47  | 1    | 8/79  |
| 2 | AKAP8L    | 1 | 2   | 3.14 | 0.05 | 3.24  | 1    | 16/79 |
| 2 | CCT7      | 1 | 2   | 3.14 | 0.05 | 0     | 1.75 | 28/79 |
| 2 | PPP2R2A   | 1 | 2   | 3.25 | 0.05 | 1.72  | 1    | 15/79 |
| 2 | LSM12     | 1 | 2   | 3.14 | 0.05 | 4.05  | 1    | 16/79 |
| 1 | PPP6C     | 1 | 1   | 2.96 | 0.05 | 1.39  | 1    | 9/79  |
| 1 | MTHFD1L   | 1 | 1   | 3.14 | 0.05 | 2.47  | 1    | 8/79  |
| 1 | UBA1      | 1 | 1   | 3.14 | 0.05 | 3     | 1    | 8/79  |
| 1 | PSMD4     | 1 | 1   | 3.12 | 0.05 | 0     | 1.6  | 13/79 |
| 1 | CTSD      | 1 | 1   | 2.96 | 0.05 | 1.91  | 1    | 9/79  |
| 1 | SDF2L1    | 1 | 1   | 3.14 | 0.05 | 2.47  | 1    | 8/79  |
| 1 | PARP1     | 1 | 1   | 2.81 | 0.05 | 1.45  | 1    | 10/79 |
| 1 | GRB2      | 1 | 1   | 2.74 | 0.05 | 0.27  | 1.52 | 16/79 |
| 1 | FIP1L1    | 1 | 1   | 3.14 | 0.05 | 3     | 1    | 8/79  |
| 1 | HSD17B4   | 1 | 1   | 2.96 | 0.05 | 1.71  | 1    | 9/79  |
| 1 | CPNE3     | 1 | 1   | 2.96 | 0.05 | 2.05  | 1    | 9/79  |
| 1 | EXOSC9    | 1 | 1   | 3.14 | 0.05 | 1.91  | 1    | 8/79  |
| 1 | PFAS      | 1 | 1   | 3.14 | 0.05 | 2.47  | 1    | 8/79  |
| 6 | RPLP0     | 2 | 7,5 | 2.47 | 0.04 | -0.16 | 1    | 78/79 |
| 7 | HSPA9     | 2 | 5,9 | 2.65 | 0.04 | -1.09 | 1    | 79/79 |
| 5 | HNRNPC    | 2 | 6,3 | 2.6  | 0.04 | 0.79  | 1.02 | 69/79 |
| 7 | HNRNPU    | 2 | 5,8 | 2.67 | 0.04 | -0.45 | 1    | 78/79 |
| 5 | ILF2      | 2 | 4,5 | 2.35 | 0.04 | 0.12  | 1    | 75/79 |
| 3 | HSPA4     | 2 | 4,2 | 2.29 | 0.04 | -0.46 | 1    | 60/79 |
| 6 | HNRNPA2B1 | 2 | 7,5 | 2.45 | 0.04 | -0.85 | 1    | 79/79 |
| 5 | HNRNPH1   | 2 | 4,5 | 2.24 | 0.04 | -0.86 | 1    | 79/79 |
| 5 | RPL4      | 2 | 4,5 | 2.26 | 0.04 | 0.29  | 1    | 78/79 |
| 5 | DHX15     | 2 | 4,5 | 2.39 | 0.04 | 0.05  | 1    | 74/79 |
| 5 | TUBB      | 2 | 5,5 | 2.24 | 0.04 | -0.67 | 1    | 79/79 |
| 5 | RPL3      | 2 | 4,5 | 2.35 | 0.04 | 0.27  | 1    | 75/79 |
| 4 | RPS8      | 2 | 4,4 | 2.2  | 0.04 | 0.44  | 1    | 72/79 |
| 4 | RPL9      | 2 | 3,4 | 2.46 | 0.04 | 0.47  | 1    | 64/79 |
| 3 | MATR3     | 2 | 3,2 | 2.58 | 0.04 | 0.51  | 1    | 53/79 |

|   |              |   |     |      |      |       |      |       |
|---|--------------|---|-----|------|------|-------|------|-------|
| 5 | TUBA4A       | 2 | 3,6 | 2.3  | 0.04 | -0.65 | 1    | 77/79 |
| 3 | PTBP1        | 1 | 3   | 2.41 | 0.04 | 0.92  | 1    | 41/79 |
| 3 | PRMT1        | 1 | 3   | 2.22 | 0.04 | 1.24  | 1    | 48/79 |
| 3 | FASN         | 2 | 3,2 | 2.41 | 0.04 | -0.09 | 1    | 57/79 |
| 6 | HNRNPAB      | 2 | 7,4 | 2.47 | 0.04 | 0.72  | 1    | 78/79 |
| 2 | RBMXL2       | 2 | 3,1 | 2.15 | 0.04 | 1.35  | 1    | 52/79 |
|   | UBC;RPS27A;U |   |     |      |      |       |      |       |
| 3 | BB           | 2 | 3,3 | 2.52 | 0.04 | -0.14 | 1.36 | 74/79 |
| 3 | RPL30        | 2 | 3,3 | 2.49 | 0.04 | 0.86  | 1    | 55/79 |
| 2 | DDX6         | 1 | 2   | 2.43 | 0.04 | 0.49  | 1.38 | 37/79 |
| 2 | NONO         | 2 | 2,2 | 2.15 | 0.04 | 1.37  | 1    | 52/79 |
| 2 | TRIM28       | 2 | 2,2 | 2.38 | 0.04 | 0.48  | 1    | 47/79 |
| 2 | RCC2         | 1 | 2   | 2.47 | 0.04 | 1.3   | 1    | 26/79 |
| 3 | RPS6         | 2 | 2,3 | 2.25 | 0.04 | 0.57  | 1    | 61/79 |
| 3 | HSP90AB1     | 2 | 2,4 | 2.16 | 0.04 | 0.08  | 1.02 | 65/79 |
| 2 | RPL19        | 2 | 1,2 | 2.49 | 0.04 | 0.62  | 1    | 45/79 |
| 4 | RPL24        | 2 | 1,7 | 2.32 | 0.04 | 1.25  | 1    | 68/79 |
| 1 | PPP2R1A      | 1 | 1   | 2.32 | 0.04 | 0.37  | 1.02 | 15/79 |
| 1 | YWHAG        | 1 | 1   | 2.37 | 0.04 | 0.47  | 1    | 14/79 |
| 1 | ALDH18A1     | 1 | 1   | 2.47 | 0.04 | 0.19  | 1.86 | 24/79 |
| 1 | WDR68        | 1 | 1   | 2.3  | 0.04 | 1.66  | 1    | 15/79 |
| 1 | RPS27        | 2 | 1,1 | 2.55 | 0.04 | 0.44  | 1    | 31/79 |
| 2 | EEF1B2       | 2 | 1,2 | 2.28 | 0.04 | 1.77  | 1    | 49/79 |
| 1 | NUP107       | 1 | 1   | 2.57 | 0.04 | 1.82  | 1    | 12/79 |
| 1 | LDHB         | 1 | 1   | 2.57 | 0.04 | 1.74  | 1    | 12/79 |
| 1 | IMPDH2       | 1 | 1   | 2.47 | 0.04 | 1.01  | 1    | 13/79 |
| 1 | AAMP         | 1 | 1   | 2.57 | 0.04 | 2.05  | 1    | 12/79 |
| 1 | LYAR         | 2 | 1,1 | 2.63 | 0.04 | 0.35  | 1    | 30/79 |
| 1 | RBM34        | 1 | 1   | 2.57 | 0.04 | 1.82  | 1    | 12/79 |
| 1 | MCM5         | 1 | 1   | 2.44 | 0.04 | 0.09  | 1.58 | 21/79 |
| 1 | ENO2         | 1 | 1   | 2.3  | 0.04 | 2.08  | 1    | 15/79 |
| 1 | SF3B4        | 1 | 1   | 2.3  | 0.04 | 1.86  | 1    | 15/79 |
| 1 | HDLBP        | 1 | 1   | 2.43 | 0.04 | 0.48  | 1.05 | 14/79 |
| 1 | RARS         | 1 | 1   | 2.57 | 0.04 | 1.69  | 1    | 12/79 |
| 1 | EXOSC5       | 1 | 1   | 2.68 | 0.04 | 2.13  | 1    | 11/79 |
| 1 | GNL3         | 1 | 1   | 2.22 | 0.04 | 1.41  | 1    | 16/79 |
| 1 | SF1          | 1 | 1   | 2.57 | 0.04 | 2.05  | 1    | 12/79 |
| 1 | KRT6C        | 1 | 1   | 2.47 | 0.04 | 1.4   | 1    | 13/79 |
| 1 | DLD          | 1 | 1   | 2.47 | 0.04 | 1.09  | 1    | 13/79 |
| 1 | SF3B14       | 2 | 1,1 | 2.63 | 0.04 | 0.77  | 1    | 30/79 |
| 1 | SLC16A1      | 1 | 1   | 2.47 | 0.04 | 1.76  | 1    | 13/79 |
| 1 | ANXA2P2      | 1 | 1   | 2.47 | 0.04 | 0.91  | 1    | 13/79 |
| 2 | DNAJA1       | 2 | 1,3 | 2.33 | 0.04 | -0.07 | 1    | 48/79 |

|   |              |   |     |      |      |       |      |       |
|---|--------------|---|-----|------|------|-------|------|-------|
| 1 | HNRNPUL2     | 2 | 1,1 | 2.72 | 0.04 | 0.85  | 1    | 29/79 |
| 1 | STAU1        | 2 | 1,1 | 2.55 | 0.04 | 0.32  | 1    | 31/79 |
| 1 | FARSA        | 1 | 1   | 2.68 | 0.04 | 0.93  | 1    | 11/79 |
| 1 | TUBA4B       | 2 | 1,1 | 2.63 | 0.04 | 0.8   | 1    | 30/79 |
| 2 | MCM3         | 1 | 2   | 2.62 | 0.04 | 0.38  | 1.31 | 30/79 |
| 2 | PRPF19       | 1 | 2   | 2.33 | 0.04 | 1.25  | 1    | 29/79 |
| 2 | PDHB         | 1 | 2   | 2.68 | 0.04 | 2.47  | 1    | 22/79 |
| 2 | SLC25A3      | 1 | 2   | 2.26 | 0.04 | 0.69  | 1    | 31/79 |
| 1 | PRPS1L1      | 1 | 1   | 2.68 | 0.04 | 2.46  | 1    | 11/79 |
| 1 | KCTD12       | 1 | 1   | 2.47 | 0.04 | 1.15  | 1    | 13/79 |
| 1 | DDB1         | 1 | 1   | 2.29 | 0.04 | -0.18 | 3.12 | 47/79 |
| 1 | C1orf25      | 1 | 1   | 2.22 | 0.04 | 1.6   | 1    | 16/79 |
| 1 | KRT6A        | 1 | 1   | 2.68 | 0.04 | 1.01  | 1    | 11/79 |
| 1 | HDAC1        | 1 | 1   | 2.57 | 0.04 | 1.54  | 1    | 12/79 |
| 1 | GTPBP4       | 1 | 1   | 2.68 | 0.04 | 1.2   | 1    | 11/79 |
| 1 | H2AFV        | 1 | 1   | 2.3  | 0.04 | 1.66  | 1    | 15/79 |
| 1 | SF3B1        | 1 | 1   | 2.16 | 0.04 | 1.04  | 1    | 17/79 |
| 1 | NXF1         | 1 | 1   | 2.16 | 0.04 | 1.71  | 1    | 17/79 |
| 1 | USP9X        | 1 | 1   | 2.35 | 0.04 | 0.05  | 1.54 | 22/79 |
| 1 | DNAH12       | 1 | 1   | 2.47 | 0.04 | 1.63  | 1    | 13/79 |
| 1 | CFL1         | 1 | 1   | 2.47 | 0.04 | 1.5   | 1    | 13/79 |
| 1 | SLC25A4      | 1 | 1   | 2.68 | 0.04 | 2.13  | 1    | 11/79 |
| 3 | ILF3         | 2 | 5,1 | 1.91 | 0.03 | -0.4  | 1    | 72/79 |
| 3 | HNRNPK       | 2 | 5,1 | 1.73 | 0.03 | -1.62 | 1    | 79/79 |
| 4 | HNRNPF       | 2 | 5,2 | 2    | 0.03 | -1.15 | 1    | 79/79 |
| 3 | HNRNPH3      | 2 | 4,2 | 1.75 | 0.03 | -1.2  | 1    | 78/79 |
| 4 | RPS3         | 2 | 4,4 | 2    | 0.03 | -0.93 | 1    | 79/79 |
| 4 | RPL6         | 2 | 4,4 | 2.08 | 0.03 | -0.65 | 1    | 76/79 |
| 3 | HNRNPA1      | 2 | 4,2 | 1.73 | 0.03 | -0.55 | 1    | 79/79 |
| 4 | RPL5         | 1 | 4   | 2.07 | 0.03 | -0.57 | 1    | 74/79 |
| 3 | NPM1         | 2 | 3,3 | 1.82 | 0.03 | -0.43 | 1    | 75/79 |
| 3 | RPLP2        | 2 | 3,3 | 1.73 | 0.03 | -1.12 | 1    | 79/79 |
| 3 | ACTB         | 2 | 3,3 | 2.11 | 0.03 | 0.66  | 1    | 65/79 |
| 3 | KRT75        | 2 | 3,3 | 1.97 | 0.03 | 0.16  | 1    | 69/79 |
| 3 | RPS4X        | 2 | 3,3 | 1.82 | 0.03 | -0.49 | 1    | 75/79 |
| 3 | RPS14        | 1 | 3   | 1.84 | 0.03 | 0.73  | 1    | 70/79 |
| 3 | LGALS3BP     | 2 | 3,3 | 1.96 | 0.03 | -0.54 | 1.09 | 76/79 |
| 4 | DNAJC10      | 2 | 3,4 | 2.08 | 0.03 | -0.31 | 1    | 76/79 |
| 2 | RPS2         | 2 | 3,1 | 1.53 | 0.03 | -0.86 | 1    | 73/79 |
| 3 | EEF1A2       | 2 | 3,2 | 1.8  | 0.03 | -0.46 | 1    | 76/79 |
| 2 | RPL7;RPL7P32 | 2 | 3,1 | 1.56 | 0.03 | -0.58 | 1    | 72/79 |
| 3 | TIAL1        | 1 | 3   | 1.77 | 0.03 | -0.93 | 1    | 76/79 |
| 3 | C1QBP        | 2 | 3,2 | 1.82 | 0.03 | -0.47 | 1    | 75/79 |

|   |            |   |     |      |      |       |      |       |
|---|------------|---|-----|------|------|-------|------|-------|
| 3 | RPL21P19   | 2 | 3,2 | 1.82 | 0.03 | -0.08 | 1    | 75/79 |
| 3 | EEF1A1     | 2 | 3,3 | 1.92 | 0.03 | 0.4   | 1    | 71/79 |
| 3 | RPL12      | 1 | 3   | 1.87 | 0.03 | 0.35  | 1    | 68/79 |
| 3 | HSPA7      | 1 | 3   | 1.76 | 0.03 | -0.59 | 1    | 77/79 |
| 2 | TUBB1      | 2 | 3,1 | 1.6  | 0.03 | -0.57 | 1    | 70/79 |
| 2 | NAP1L1     | 1 | 2   | 1.56 | 0.03 | 0.16  | 1    | 65/79 |
| 3 | CSDA       | 2 | 2,3 | 1.78 | 0.03 | -0.61 | 1    | 77/79 |
| 2 | HNRNPR     | 2 | 2,2 | 1.57 | 0.03 | -0.5  | 1    | 71/79 |
| 3 | DDX3X      | 2 | 2,3 | 1.73 | 0.03 | -1.78 | 1    | 79/79 |
| 2 | RPL22      | 2 | 2,1 | 1.74 | 0.03 | 0.73  | 1    | 64/79 |
| 2 | SF3B3      | 2 | 2,2 | 2.06 | 0.03 | 0.2   | 1    | 54/79 |
| 2 | LOC652595  | 1 | 2   | 1.7  | 0.03 | 0.42  | 1    | 55/79 |
| 2 | GRWD1      | 2 | 2,1 | 1.73 | 0.03 | 0.46  | 1    | 65/79 |
| 2 | RPS10      | 2 | 2,1 | 1.67 | 0.03 | -0.15 | 1    | 67/79 |
| 2 | SYNCRIP    | 1 | 2   | 1.54 | 0.03 | -0.54 | 1    | 67/79 |
| 2 | SNRPE      | 2 | 2,1 | 1.56 | 0.03 | -0.52 | 1    | 72/79 |
| 2 | RPS7       | 2 | 2,1 | 1.92 | 0.03 | -0.07 | 1    | 58/79 |
| 2 | SEC23A     | 2 | 2,2 | 1.6  | 0.03 | -0.17 | 1    | 70/79 |
| 2 | RPL27      | 2 | 2,2 | 1.56 | 0.03 | -0.15 | 1    | 72/79 |
| 3 | HIST1H1C   | 2 | 2,4 | 1.85 | 0.03 | -0.14 | 1    | 74/79 |
| 2 | PRDX2      | 1 | 2   | 1.79 | 0.03 | 0.81  | 1    | 49/79 |
| 2 | RPS25      | 1 | 2   | 1.56 | 0.03 | -0.09 | 1    | 65/79 |
| 2 | SLC25A5    | 2 | 2,2 | 1.77 | 0.03 | -0.22 | 1    | 63/79 |
| 2 | RPL27A     | 1 | 2   | 1.79 | 0.03 | 0.92  | 1    | 49/79 |
| 4 | DDX5       | 2 | 2,5 | 2    | 0.03 | -1.09 | 1    | 79/79 |
| 2 | RPL31      | 2 | 2,1 | 1.57 | 0.03 | 0.18  | 1    | 71/79 |
| 2 | RBM14;RBM4 | 1 | 2   | 1.56 | 0.03 | -0.39 | 1    | 65/79 |
| 2 | PABPC4     | 1 | 2   | 1.54 | 0.03 | -0.47 | 1    | 67/79 |
| 2 | RPS9       | 2 | 2,2 | 2.06 | 0.03 | 0.03  | 1    | 54/79 |
| 2 | THOC4      | 2 | 2,1 | 2.04 | 0.03 | 0.27  | 1    | 55/79 |
| 1 | PCBP2      | 1 | 1   | 1.81 | 0.03 | 0.91  | 1    | 24/79 |
| 1 | RBM4       | 1 | 1   | 1.85 | 0.03 | 0.98  | 1    | 23/79 |
| 1 | YWHAZ      | 1 | 1   | 2.12 | 0.03 | 0.14  | 1.19 | 21/79 |
| 2 | RPL10P16   | 2 | 1,2 | 1.8  | 0.03 | 0.53  | 1    | 62/79 |
| 1 | SERBP1     | 2 | 1,1 | 1.88 | 0.03 | 0.13  | 1    | 42/79 |
| 2 | RPS23      | 2 | 1,2 | 1.87 | 0.03 | 0.91  | 1    | 60/79 |
| 2 | RPL10A     | 2 | 1,2 | 1.84 | 0.03 | -0.04 | 1    | 61/79 |
| 3 | HNRNPCL1   | 2 | 1,4 | 2.08 | 0.03 | 0.88  | 1    | 66/79 |
| 1 | SEC24A     | 1 | 1   | 1.62 | 0.03 | 0.84  | 1    | 30/79 |
| 2 | BAG4       | 2 | 1,2 | 1.56 | 0.03 | -0.7  | 1    | 72/79 |
| 1 | CCBL2      | 2 | 1,1 | 1.93 | 0.03 | 0.53  | 1    | 41/79 |
| 2 | GAPDH      | 2 | 1,2 | 1.73 | 0.03 | 0.37  | 1    | 65/79 |
| 2 | KHSRP      | 2 | 1,3 | 1.61 | 0.03 | -0.19 | 1    | 69/79 |

|   |           |   |     |      |      |       |      |       |
|---|-----------|---|-----|------|------|-------|------|-------|
| 2 | HIST2H2BE | 2 | 1,2 | 1.67 | 0.03 | -0.06 | 1    | 67/79 |
| 1 | NUDT21    | 2 | 1,1 | 2.03 | 0.03 | 0.16  | 1    | 39/79 |
| 1 | C7orf50   | 1 | 1   | 1.94 | 0.03 | 1.03  | 1    | 21/79 |
| 1 | RPS5      | 1 | 1   | 1.65 | 0.03 | 0.55  | 1    | 29/79 |
| 1 | OLA1      | 1 | 1   | 1.94 | 0.03 | 1.14  | 1    | 21/79 |
| 1 | CCT8      | 1 | 1   | 1.77 | 0.03 | -0.29 | 1.55 | 39/79 |
| 2 | SDHA      | 2 | 1,2 | 1.74 | 0.03 | 0.41  | 1    | 64/79 |
| 1 | DYNC1H1   | 1 | 1   | 2.04 | 0.03 | 0.2   | 1    | 19/79 |
| 1 | TUBB6     | 1 | 1   | 1.81 | 0.03 | 0.25  | 1    | 24/79 |
| 1 | KRT24     | 2 | 1,1 | 1.52 | 0.03 | 0     | 1    | 52/79 |
| 1 | SEC24C    | 1 | 1   | 1.85 | 0.03 | 0.69  | 1    | 23/79 |
| 1 | PPP1CC    | 1 | 1   | 1.65 | 0.03 | 0.78  | 1    | 29/79 |
| 1 | MRPS22    | 1 | 1   | 1.52 | 0.03 | 0.06  | 1    | 34/79 |
| 1 | PUF60     | 1 | 1   | 1.65 | 0.03 | 0.45  | 1    | 29/79 |
| 1 | RPS26P11  | 1 | 1   | 1.99 | 0.03 | 1.27  | 1    | 20/79 |
| 1 | KIAA1967  | 1 | 1   | 1.89 | 0.03 | 0.6   | 1    | 22/79 |
| 1 | RPL14     | 2 | 1,1 | 1.61 | 0.03 | 0.15  | 1    | 49/79 |
| 1 | SART3     | 1 | 1   | 1.96 | 0.03 | -0.23 | 2.76 | 57/79 |
| 1 | CPSF6     | 2 | 1,1 | 1.68 | 0.03 | -0.03 | 1    | 47/79 |
| 1 | PWP1      | 1 | 1   | 1.52 | 0.03 | 0.28  | 1    | 34/79 |
| 1 | CCT5      | 1 | 1   | 1.66 | 0.03 | -0.26 | 1.68 | 48/79 |
| 1 | RPL28     | 1 | 1   | 1.62 | 0.03 | 0.74  | 1    | 30/79 |
| 2 | ATP5A1    | 2 | 1,2 | 2.06 | 0.03 | -0.16 | 1    | 54/79 |
| 1 | SFRS4     | 1 | 1   | 1.6  | 0.03 | 0.64  | 1    | 31/79 |
| 2 | RPS17     | 2 | 1,2 | 2.11 | 0.03 | 0.26  | 1    | 53/79 |
| 2 | PCNA      | 1 | 2   | 1.9  | 0.03 | 0.75  | 1    | 44/79 |
| 2 | AIFM1     | 1 | 2   | 1.74 | 0.03 | -0.13 | 1    | 52/79 |
| 2 | HIST1H2AB | 1 | 2   | 1.9  | 0.03 | 0.84  | 1    | 44/79 |
| 2 | RPL23A    | 1 | 2   | 1.55 | 0.03 | 0.1   | 1    | 66/79 |
| 2 | RPL35A    | 1 | 2   | 2.07 | 0.03 | 2.13  | 1    | 37/79 |
| 1 | MYBBP1A   | 1 | 1   | 1.68 | 0.03 | -0.13 | 1    | 28/79 |
| 1 | SSBP1     | 1 | 1   | 1.54 | 0.03 | 0.19  | 1.11 | 37/79 |
| 1 | KARS      | 1 | 1   | 2.04 | 0.03 | 1.05  | 1    | 19/79 |
| 1 | ADAR      | 1 | 1   | 2.04 | 0.03 | 1.2   | 1    | 19/79 |
| 1 | ATP1A1    | 1 | 1   | 1.78 | 0.03 | 0.13  | 1    | 25/79 |
| 1 | S100A7    | 1 | 1   | 1.99 | 0.03 | 1     | 1    | 20/79 |
| 1 | NSUN2     | 1 | 1   | 1.99 | 0.03 | 1.06  | 1    | 20/79 |
| 1 | AKAP8     | 1 | 1   | 1.81 | 0.03 | 0.9   | 1    | 24/79 |
| 1 | POLDIP2   | 1 | 1   | 2.1  | 0.03 | 0.92  | 1    | 18/79 |
| 1 | STRAP     | 1 | 1   | 1.6  | 0.03 | 0.65  | 1    | 31/79 |
| 1 | RPL26L1   | 1 | 1   | 1.55 | 0.03 | 0.34  | 1    | 33/79 |
| 1 | DNAJA2    | 1 | 1   | 1.62 | 0.03 | -0.02 | 1    | 30/79 |
| 2 | DDX1      | 2 | 3,1 | 1.46 | 0.02 | -0.85 | 1    | 77/79 |

|   |              |   |     |      |      |       |      |       |
|---|--------------|---|-----|------|------|-------|------|-------|
| 2 | FUS          | 2 | 3,1 | 1.41 | 0.02 | -1.54 | 1    | 79/79 |
| 2 | RPL8         | 1 | 2   | 1.5  | 0.02 | 0.09  | 1    | 70/79 |
| 2 | YBX1         | 1 | 2   | 1.5  | 0.02 | 0.32  | 1    | 70/79 |
| 2 | RPS24        | 2 | 2,1 | 1.47 | 0.02 | -0.64 | 1    | 76/79 |
| 2 | DDX17        | 2 | 2,1 | 1.43 | 0.02 | -1.1  | 1    | 78/79 |
| 2 | DAZAP1       | 1 | 2   | 1.41 | 0.02 | -0.93 | 1    | 79/79 |
| 1 | EWSR1        | 1 | 1   | 1.01 | 0.02 | -1.52 | 1    | 77/79 |
| 2 | TUBA1C       | 2 | 1,3 | 1.43 | 0.02 | -0.9  | 1    | 78/79 |
| 2 | TAF15        | 2 | 1,2 | 1.41 | 0.02 | -1.27 | 1    | 79/79 |
| 1 | HNRNPA3      | 2 | 1,1 | 1.04 | 0.02 | -1.25 | 1    | 76/79 |
| 1 | HNRNPA0      | 1 | 1   | 1.12 | 0.02 | -0.39 | 1    | 63/79 |
| 1 | RPL11        | 2 | 1,1 | 1.01 | 0.02 | -0.82 | 1    | 78/79 |
| 2 | RPL15        | 2 | 1,2 | 1.48 | 0.02 | -0.59 | 1    | 75/79 |
| 1 | CIRBP        | 1 | 1   | 1.22 | 0.02 | -0.21 | 1    | 53/79 |
| 1 | ACTBL2       | 2 | 1,1 | 1.22 | 0.02 | -0.29 | 1    | 65/79 |
| 1 | RPL29P30     | 1 | 1   | 1.05 | 0.02 | -0.06 | 1    | 71/79 |
| 1 | SNRPA        | 2 | 1,1 | 1.3  | 0.02 | -0.52 | 1    | 61/79 |
| 1 | RPS20        | 1 | 1   | 1.02 | 0.02 | -1.29 | 1    | 75/79 |
| 1 | LOC100131813 | 1 | 1   | 1.44 | 0.02 | 0.96  | 1    | 38/79 |
| 1 | ELAVL1       | 2 | 1,1 | 1.18 | 0.02 | -0.49 | 1    | 67/79 |
| 1 | RBBP4        | 1 | 1   | 1.33 | 0.02 | 0.32  | 1    | 45/79 |
| 1 | CLTCL1       | 1 | 1   | 1.32 | 0.02 | -0.22 | 1.02 | 46/79 |
| 1 | SFRS2        | 1 | 1   | 1.15 | 0.02 | -0.16 | 1    | 60/79 |
| 1 | FTSJ3        | 1 | 1   | 1.5  | 0.02 | 0.17  | 1    | 35/79 |
| 1 | RPL13A       | 2 | 1,1 | 1.23 | 0.02 | -0.27 | 1    | 64/79 |
| 1 | IGF2BP3      | 1 | 1   | 1.41 | 0.02 | -0.04 | 1    | 40/79 |
| 1 | RPL23        | 2 | 1,1 | 1.16 | 0.02 | -0.74 | 1    | 68/79 |
| 1 | HSP90AA2     | 1 | 1   | 1.17 | 0.02 | -0.29 | 1    | 58/79 |
| 1 | RSL1D1       | 1 | 1   | 1.3  | 0.02 | -0.19 | 1    | 47/79 |
| 1 | FAM98A       | 1 | 1   | 1.17 | 0.02 | -0.42 | 1    | 58/79 |
| 1 | LOC646057    | 1 | 1   | 1.04 | 0.02 | -1.07 | 1    | 73/79 |
| 1 | DAP3         | 1 | 1   | 1.41 | 0.02 | 0.13  | 1    | 40/79 |
| 1 | RPL35        | 1 | 1   | 1.24 | 0.02 | 0.25  | 1    | 51/79 |
| 1 | SLC25A6      | 1 | 1   | 1.48 | 0.02 | -0.12 | 1    | 36/79 |
| 1 | XRN2         | 2 | 1,1 | 1.22 | 0.02 | -0.71 | 1    | 65/79 |
| 1 | SMARCA4      | 2 | 1,1 | 1.36 | 0.02 | -0.54 | 1    | 58/79 |
| 1 | SNRPC        | 1 | 1   | 1.05 | 0.02 | -0.75 | 1    | 72/79 |
| 1 | H1FX         | 1 | 1   | 1.42 | 0.02 | 0.37  | 1    | 39/79 |
| 1 | RPL36AP37    | 2 | 1,1 | 1.11 | 0.02 | -0.91 | 1    | 71/79 |
| 1 | C14orf166    | 2 | 1,1 | 1.14 | 0.02 | -0.75 | 1    | 69/79 |
| 1 | PLOD1        | 2 | 1,1 | 1.08 | 0.02 | -0.95 | 1    | 73/79 |
| 1 | RPS16        | 2 | 1,1 | 1.01 | 0.02 | -0.86 | 1    | 78/79 |
| 1 | TUBB2A       | 1 | 1   | 1.5  | 0.02 | -0.09 | 1    | 35/79 |

|   |          |   |     |      |      |       |   |       |
|---|----------|---|-----|------|------|-------|---|-------|
| 1 | HNRNPL   | 1 | 1   | 1.1  | 0.02 | -0.69 | 1 | 66/79 |
| 1 | TXN      | 2 | 1,1 | 1.27 | 0.02 | -0.46 | 1 | 62/79 |
| 1 | LARP1    | 1 | 1   | 1.1  | 0.02 | -0.63 | 1 | 66/79 |
| 1 | PCBD1    | 1 | 1   | 1.48 | 0.02 | 0.29  | 1 | 36/79 |
| 1 | RPL10L   | 1 | 1   | 1.19 | 0.02 | 0.08  | 1 | 56/79 |
| 1 | SFRS7    | 2 | 1,1 | 1.23 | 0.02 | -0.58 | 1 | 64/79 |
| 2 | RPL18    | 2 | 1,3 | 1.51 | 0.02 | -0.42 | 1 | 74/79 |
| 1 | RPS3A    | 1 | 1   | 1.12 | 0.02 | -0.65 | 1 | 63/79 |
| 1 | TTN      | 1 | 1   | 1.34 | 0.02 | -0.24 | 1 | 44/79 |
| 1 | NOP2     | 1 | 1   | 1.5  | 0.02 | -0.06 | 1 | 35/79 |
| 1 | RPL18A   | 1 | 1   | 1.31 | 0.02 | -0.02 | 1 | 46/79 |
| 1 | RPL13    | 2 | 1,1 | 1.23 | 0.02 | -0.58 | 1 | 64/79 |
| 1 | RPS13    | 1 | 1   | 1.11 | 0.02 | -0.74 | 1 | 64/79 |
| 1 | RPL36    | 1 | 1   | 1.15 | 0.02 | -0.29 | 1 | 60/79 |
| 2 | HNRPDL   | 1 | 2   | 1.45 | 0.02 | -0.78 | 1 | 75/79 |
| 2 | HNRNPD   | 1 | 2   | 1.42 | 0.02 | -0.93 | 1 | 78/79 |
| 1 | PRDX3    | 1 | 1   | 1.39 | 0.02 | 0.39  | 1 | 41/79 |
| 1 | RPS15A   | 1 | 1   | 1.08 | 0.02 | -0.51 | 1 | 68/79 |
| 1 | RPL7AP27 | 1 | 1   | 1.12 | 0.02 | -0.37 | 1 | 63/79 |
| 1 | RPL38    | 1 | 1   | 1.21 | 0.02 | -0.19 | 1 | 54/79 |
| 1 | QPCT     | 1 | 1   | 1.31 | 0.02 | -0.27 | 1 | 46/79 |
| 1 | KPNB1    | 1 | 1   | 1.39 | 0.02 | -0.11 | 1 | 41/79 |
| 1 | SNRPD3   | 1 | 1   | 1.05 | 0.02 | -0.53 | 1 | 72/79 |
| 1 | SNRPD1   | 1 | 1   | 1.02 | 0.02 | -1.59 | 1 | 76/79 |
| 1 | HSP90B1  | 1 | 1   | 1.31 | 0.02 | 0.15  | 1 | 46/79 |
| 1 | HSPA4L   | 1 | 1   | 1.42 | 0.02 | -0.12 | 1 | 39/79 |
| 1 | RPS19    | 1 | 1   | 1.18 | 0.02 | -0.58 | 1 | 57/79 |
| 1 | DHX30    | 1 | 1   | 1.17 | 0.02 | -0.6  | 1 | 58/79 |
